## Parametric information about eye movements is sent to the ears

Stephanie N Lovich<sup>1-4\*</sup>, Cynthia D King<sup>1-4\*</sup>, David LK Murphy<sup>1,3,4\*</sup>, Rachel Landrum<sup>1-4</sup>, Christopher A Shera<sup>7</sup>, Jennifer M Groh<sup>1-6</sup>

\*These authors contributed equally to this work and are listed in reverse chronological order of their period of most intense involvement.

<sup>1</sup>Department of Psychology and Neuroscience

<sup>2</sup>Department of Neurobiology

<sup>3</sup>Center for Cognitive Neuroscience

<sup>4</sup>Duke Institute for Brain Sciences

<sup>5</sup>Department of Computer Science

<sup>6</sup>Department of Biomedical Engineering  
Duke University

<sup>7</sup>Dept. of Otolaryngology  
University of Southern California

### 1 Acknowledgments

2

3 We are grateful to Dr. Matthew Cooper, Dr. Kurtis Gruters, Dr. David Kaylie, Dr. Jeff Mohl,  
4 Dr. Shawn Willett, Meredith Schmehl, Dr. David Smith, Chloe Weiser and Justine Shih  
5 for discussions and assistance concerning this project. This work was supported by NIH  
6 (NIDCD) grant DC017532 to JMG.

## 7 Abstract

8 Eye movements alter the relationship between the visual and auditory spatial scenes.  
9 Signals related to eye movements affect neural pathways from the ear through auditory  
10 cortex and beyond, but how these signals contribute to computing the locations of  
11 sounds with respect to the visual scene is poorly understood. Here, we evaluated the  
12 information contained in eye movement-related eardrum oscillations (EMREOs),  
13 pressure changes recorded in the ear canal that occur in conjunction with simultaneous  
14 eye movements. We show that EMREOs contain parametric information about  
15 horizontal and vertical eye displacement as well as initial/final eye position with respect  
16 to the head. The parametric information in the horizontal and vertical directions  
17 combines linearly, allowing accurate prediction of the EMREOs associated with oblique  
18 eye movements from their respective horizontal and vertical components. Target  
19 location can also be inferred from the EMREO signals recorded during eye movements  
20 to those targets. We hypothesize that the thus-far unknown mechanism underlying  
21 EMREOs could impose a two-dimensional eye-movement related transfer function on  
22 any incoming sound, permitting subsequent processing stages to compute the positions  
23 of sounds in relation to the visual scene.

## 24 Introduction

25 Every time we move our eyes to localize multisensory stimuli, our retinae move in  
26 relation to our ears. These movements shift the alignment of the visual scene (as  
27 detected by the retinal surface) with respect to the auditory scene (as detected based  
28 on timing, loudness, and frequency differences in relation to the head and ears).  
29 Precise information about each eye movement is therefore needed to connect the  
30 brain's views of visual and auditory space to one another (e.g. e.g. Groh and Sparks,  
31 1992; Boucher et al., 2001; Metzger et al., 2004). Most previous work about how eye  
32 movement information is incorporated into auditory processing has focused on cortical  
33 and subcortical brain structures (Jay and Sparks, 1984, 1987a, b; Russo and Bruce,  
34 1994; Hartline et al., 1995; Stricanne et al., 1996; Cohen and Andersen, 2000; Groh et  
35 al., 2001; Zella et al., 2001; Werner-Reiss et al., 2003; Fu et al., 2004; Populin et al.,  
36 2004; Zwiers et al., 2004; Mullette-Gillman et al., 2005; Porter et al., 2006; Mullette-  
37 Gillman et al., 2009; Maier and Groh, 2010; Bulkin and Groh, 2012a, b; Lee and Groh,

38 2012; Caruso et al., 2021), but the recent discovery of eye-movement related eardrum  
39 oscillations (EMREOs) (Gruters et al., 2018) suggests that the process might be  
40 manifest much earlier in the auditory periphery. EMREOs can be thought of as a  
41 biomarker of underlying efferent information impacting the internal structures of the ear  
42 in association with eye movements. What information this efferent signal contains is  
43 currently unknown.

44 We reasoned that if this efferent signal is to play a role in linking auditory and  
45 visual space across eye movements, EMREOs should be *parametrically* related to the  
46 associated eye movement. Specifically, EMREOs should vary in a regular and  
47 predictable fashion with both horizontal and vertical displacements of the eyes, and  
48 some form of information regarding the initial position of the eyes should also be  
49 present. These properties are required if the efferent signal underlying EMREOs is to  
50 play a role in linking hearing and vision. Notably, this parametric relationship is not  
51 required of alternative possible roles, such as synchronizing visual and auditory  
52 processing in time or enhanced attentional processing of sounds regardless of their  
53 spatial location (Barczak et al., 2019; O'Connell et al., 2020).

54 Accordingly, we evaluated the parametric spatial properties of EMREOs in  
55 human participants by varying the starting and ending positions of visually-guided  
56 saccades in two dimensions. We find that EMREOs do in fact vary parametrically  
57 depending on the saccade parameters in both horizontal and vertical dimensions and as  
58 a function of both initial eye position in the orbits and the change in eye position relative  
59 to that initial position. EMREOs associated with oblique saccades can be predicted by  
60 the linear combination of the EMREOs associated with strictly horizontal and vertical  
61 saccades. Furthermore, an estimate of target location can be decoded from EMREOs  
62 alone – i.e. where subjects looked in space can be roughly determined from their  
63 observed EMREOs.

64 These findings suggest that the eye-movement information needed to accomplish a  
65 coordinate transformation of incoming sounds into a visual reference frame is fully  
66 available in the most peripheral part of the auditory system. While the precise mechanism  
67 that creates EMREOs remains unknown, we propose that the underlying mechanisms  
68 might introduce a transfer function to the sound transduction process that serves to adjust

69 the gain, latency, and/or spectral dependence of responses in the cochlea. In principle,  
 70 this could provide later stages of auditory processing access to an eye-centered signal  
 71 of sound location for registration with the eye-centered visual scene (Groh and Sparks,  
 72 1992). Indeed, recent work has shown that changes in muscular tension on the ossicular  
 73 chain would be expected to affect gain and latency of sound transmission through the  
 74 middle ear, thus supporting the plausibility of this hypothesis (Gallagher et al., 2021; Cho  
 75 et al., in revision).

76

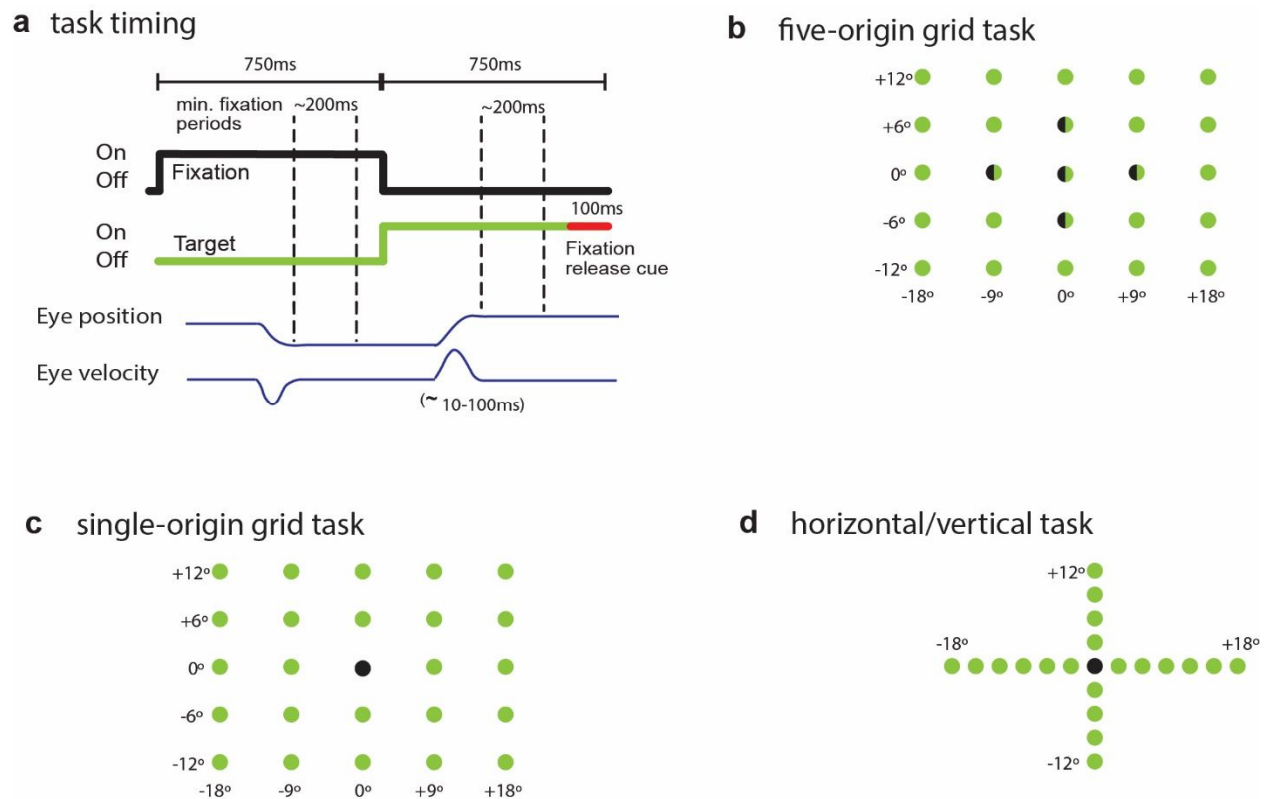

77

78

79 *Figure 1. Events of the tasks in time and space. a. Task events across time. Each trial*  
 80 *began with the onset of an initial “fixation” cue (black trace). Participants made saccades*  
 81 *to the fixation point, then maintained fixation for a minimum of 200 ms. The fixation point*  
 82 *was then turned off and a new “target” was turned on (green trace). Participants*  
 83 *saccaded to this target and fixated for another 200 ms, at which point the target turned*  
 84 *red indicating that the trial was over. The ear-canal recordings were analyzed in*  
 85 *conjunction with the fixation-point-to-target saccade. b-d. Spatial layouts of fixation*  
 86 *points and targets for the three task designs used in this study. Points in space that were*  
 87 *used as both a fixation and a target across different trials are half-green, half-black.*

88

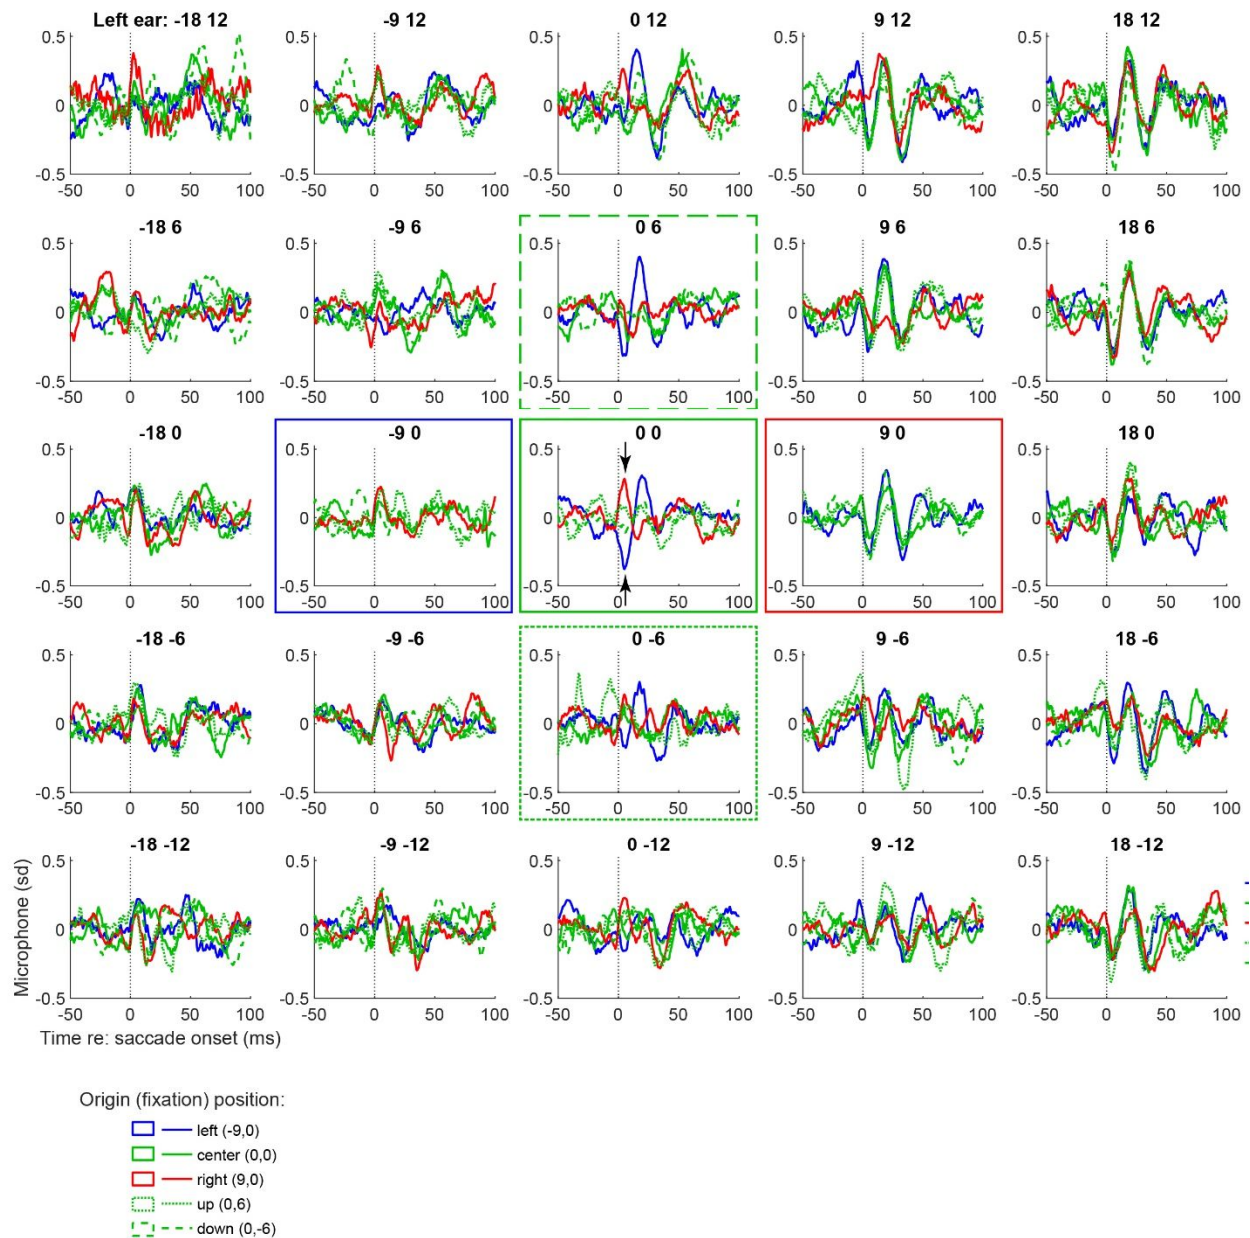

89

90 *Figure 2. EMREOs recorded during the five-origin grid task. Each panel shows*  
 91 *the grand average EMREO signal generated when saccades were made to that location*  
 92 *on the screen (average of N=10 subjects' individual left ear averages). For example,*  
 93 *the top right panel shows microphone recordings during saccades to the top right*  
 94 *(contralateral) target location, and the color and line styles of each trace in that panel*  
 95 *correspond to saccades from different initial fixation points. e.g. the red traces*  
 96 *originated from the rightward fixation, the blue from the leftward fixation etc as indicated*  
 97 *by the legend and boxes of the same color and line style. Both magnitude and phase*  
 98 *vary as a function of initial eye position and target location, with contralateral responses*  
 99 *being larger than ipsilateral. Phase reversal occurs based on the location of the target*  
 100 *with respect to the initial fixation position, as can be seen for the central target location*  
 101 *(central panel), where the EMREOs evoked for saccades from the rightward fixation (ed*

102 *traces) show an opposite phase relationship as those evoked for saccades from the*  
103 *leftward fixation (blue traces). Corresponding grand averages for right ear data are*  
104 *shown in Supplementary Figure 1.*

## 105 Results

106 We used earbud microphones to record internally-generated oscillations in the  
107 ear canals of human subjects (n=10 for each task) while they performed eye-movement  
108 tasks involving various visual fixation and target configurations (Figure 1). No external  
109 sounds were presented in any task. The events of the tasks in time are shown in Figure  
110 1a. At the beginning of each trial, subjects fixated a visual fixation point for 750 ms and  
111 then made a saccade to a second target, which they then fixated for another 200 ms.  
112 Any trials with micro- or corrective saccades during the 200 ms prior to or following main  
113 fixation-point-to-target saccade were discarded, to ensure a stable baseline ear-canal  
114 recording could be established without intrusions by other eye movements. Ten  
115 subjects were tested in the single origin and horizontal/vertical tasks, and ten were  
116 tested in the five-origin grid task. Four subjects participated in both groups, so that 16  
117 subjects (8 female, 8 male) were tested overall. Female-male ratios were equal in both  
118 subgroups.

119 We first tested subjects (N=10) on a task involving variation in both initial fixation  
120 position and target locations varying along both horizontal and vertical dimensions – the  
121 “five-origin grid task”. Subjects fixated on an initial fixation light located either straight  
122 ahead, 9° left or right, or 6° up or down, and then made a saccade to a target located  
123 within the array of possible target locations spanning +/- 18° horizontally and +/- 12°  
124 vertically as shown in Figure 1B. Results of this task are shown in Figure 2. Each panel  
125 shows the average microphone signal recorded in the left ear canal (averaged across  
126 all subjects) associated with saccades to a target at that location – e.g. the top right  
127 panel shows all saccades to the top right target location. The color and line styles of the  
128 waveforms correspond to the five initial fixation positions from which the saccades could  
129 originate in space.

130 The first overall observation from this figure is that the *magnitude* of the  
131 waveform of the EMREO depends on both the *horizontal* and *vertical* dimensions. In  
132 the horizontal dimension, EMREOs are larger for more contralateral target locations:  
133 compare the column on the right (contralateral) to the column on the left (ipsilateral).

134 The pattern is reversed for right ear canal recordings (Supplementary Figure 1). In the  
135 vertical dimension, EMREOs are larger for higher vs lower targets in both left and right  
136 ears (compare top row to bottom row in Figure 1/Supplementary Figure 1).

137 The second overall observation from this figure is that the *phase* of the EMREO  
138 waveform depends on the horizontal location of the target *with respect to* the fixation  
139 position. Specifically, the first deflection after saccade onset is a peak for the most  
140 ipsilateral targets (left-most column) and trough for the most contralateral targets (right-  
141 most column). But *where* this pattern reverses depends on the initial fixation position.  
142 Specifically, consider the red vs blue traces in the middle column of the figure, which  
143 correspond to targets along the vertical meridian. Red traces involve saccades to these  
144 targets from the fixation position on the right, and thus involve leftward (ipsiversive)  
145 saccades. The red traces in this column begin with a peak followed by a trough. In  
146 contrast, the blue traces involve saccades to these targets from the fixation position on  
147 the left, i.e. rightward or contraversive saccades. The blue traces begin with a trough  
148 followed by a peak. The pattern is particularly evident in the central panel (see arrows).

149 The phase reversal as a function of the combination of target location and initial  
150 eye position suggests that the EMREO waveforms might align *better* when plotted in an  
151 eye-centered frame of reference. Figure 3 demonstrates that this is indeed the case:  
152 the data from Figure 2 is re-plotted as a function of target location *relative* to the fixation  
153 position. The eight panels around the center represent the traces for the subset of  
154 targets that can be fully analyzed in an eye-centered frame, i.e. the targets immediately  
155 left, right, up, down, and diagonal relative to the five fixation locations. By plotting the  
156 data based on the relative location of the targets to the origins, the waveforms are better  
157 aligned, showing no obvious phase reversals.

158

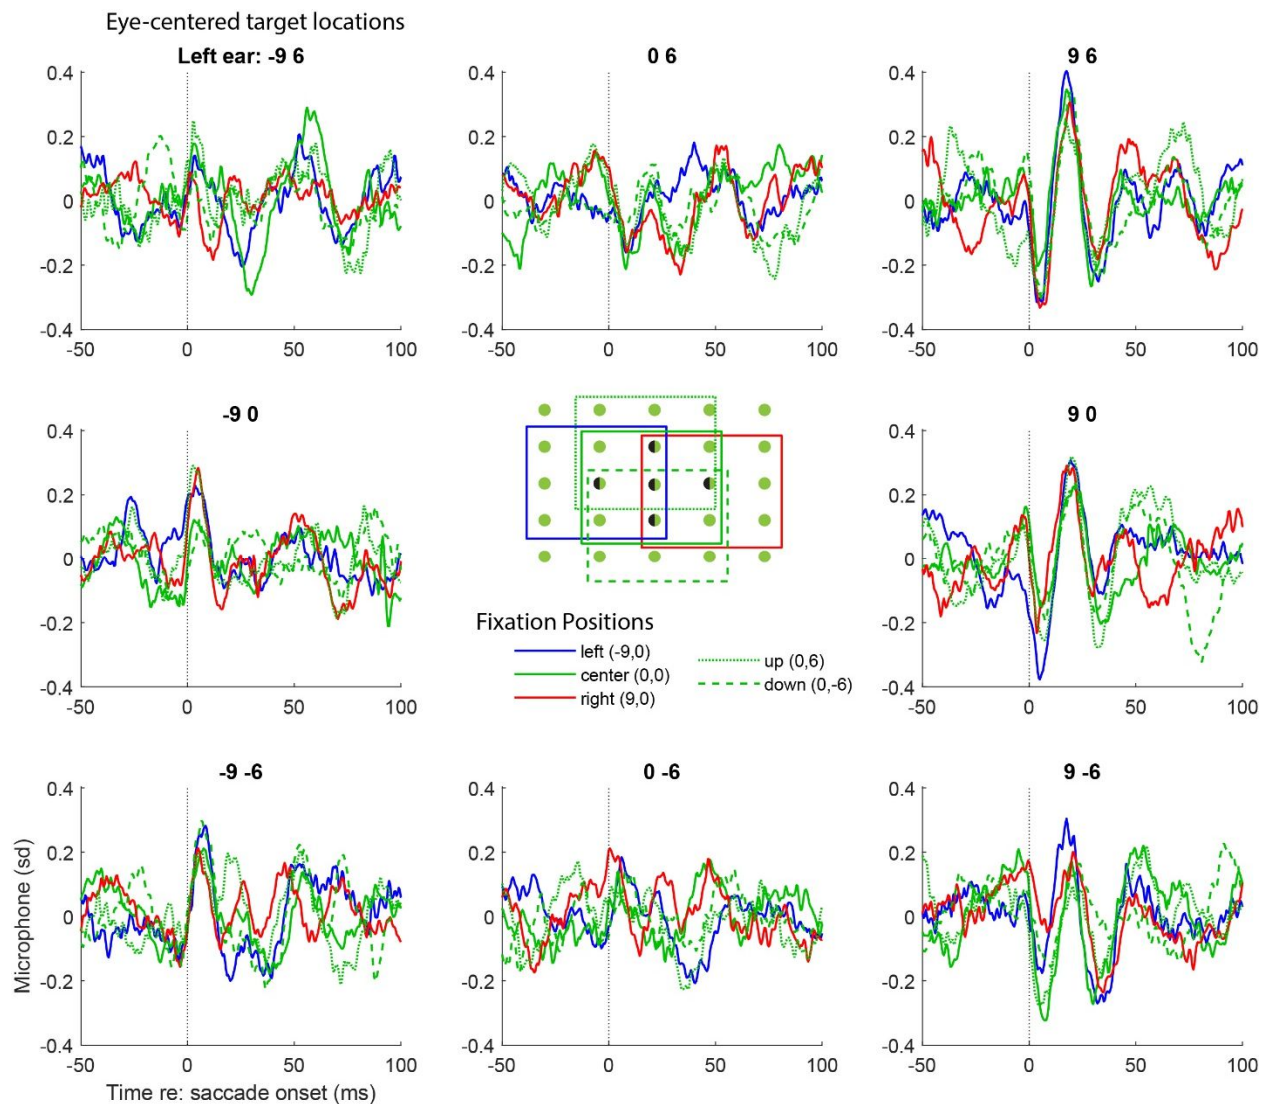

159

160 *Figure 3. Replotting the grand average EMREOs as a function of relative target*  
161 *location shows better, but not perfect, correspondence of the EMREOs across different*  
162 *fixation positions. The data shown are a subset of those shown in Figure 2, but here*  
163 *each panel location corresponds to a particular target location defined relative to the*  
164 *associated fixation position. The color/linestyle indicates the associated relative fixation*  
165 *position. For example, the waveforms in the upper right panel all involved 9° rightward*  
166 *and 6° upward saccades; the red trace in that panel indicates those that originated from*  
167 *the 9° right fixation; the blue those from the 9° left fixation etc. Only relative target*  
168 *locations that existed for all 5 fixation positions are plotted, as indicated by the inset.*  
169 *Corresponding right ear data are shown in Supplementary Figure 2.*

170 Although the waveforms are better aligned when plotted based on target location  
171 *relative* to initial eye position, some variation related to fixation position is still evident in  
172 the traces. That is, in each panel, the EMREO waveforms with different colors/line  
173 styles (corresponding to different fixation positions) do not necessarily superimpose  
174 perfectly. This suggests that a model that incorporates both relative target position and



175 original fixation position, in both horizontal and vertical dimensions, is needed to  
176 account for the findings. Furthermore, a statistical accounting of these effects is needed.  
177 Accordingly, we fit the data to the following regression equation:

178

$$179 \quad \text{Mic}(t) = B_H(t) H + B_{\Delta H}(t) \Delta H + B_V(t) V + B_{\Delta V}(t) \Delta V + C(t) \quad \text{Eq 1}$$

180 where  $H$  and  $V$  correspond to the initial horizontal and vertical eye position and  $\Delta H$  and  
181  $\Delta V$  correspond to the respective changes in position associated with that trial. The  
182 slope coefficients  $B_H$ ,  $B_{\Delta H}$ ,  $B_V$ ,  $B_{\Delta V}$  are time-varying and reflect the dependence of the  
183 microphone signal on the respective eye position/movement parameters. The term  $C(t)$   
184 contributes a time-varying “constant” independent of eye movement metrics. It can be  
185 thought of as the best fitting average oscillation across all initial eye positions and  
186 changes in eye position. We used the measured values of eye position/change in eye  
187 position for this analysis rather than the associated fixation and target locations so as to  
188 incorporate trial-by-trial variability in fixation and saccade accuracy.

189 Figure 4 shows the average time-varying values of the slope coefficients across  
190 subjects (blue = left ear; red = right ear) and provides information about the contribution  
191 of these various eye movement parameters to the EMREO signal-ear. A strong,  
192 consistent dependence on horizontal eye displacement is observed, consistent with our  
193 previous report (Figure 4A) (Gruters et al., 2018). This component is oscillatory and  
194 begins slightly before the onset of the eye movement, inverting in phase for left vs right  
195 ears. The thickened parts of the line indicate periods of time when this coefficient  
196 differed significantly from 0 with 95% confidence (Shaded areas are +/-SEM). There is  
197 also an oscillatory and binaurally phase-inverting signal related to the initial position of  
198 the eyes in the horizontal dimension (Figure 4B). This signal is smaller and more  
199 variable across subjects.

200 In the vertical dimension, the effect of vertical saccade amplitude is in phase for  
201 both the left and right ears; it exhibits an oscillatory pattern, although not obviously  
202 sinusoidal like the one observed for the horizontal saccade amplitude. Initial position of  
203 the eyes in the vertical dimension exerts a variable effect across participants such that it  
204 is not particularly evident in this grand average analysis; this may be related to poorer

205 abilities to localize sounds in the vertical vs. horizontal dimensions (Hebrank and  
 206 Wright, 1974a, b; Middlebrooks and Green, 1991; Macpherson and Sabin, 2013).

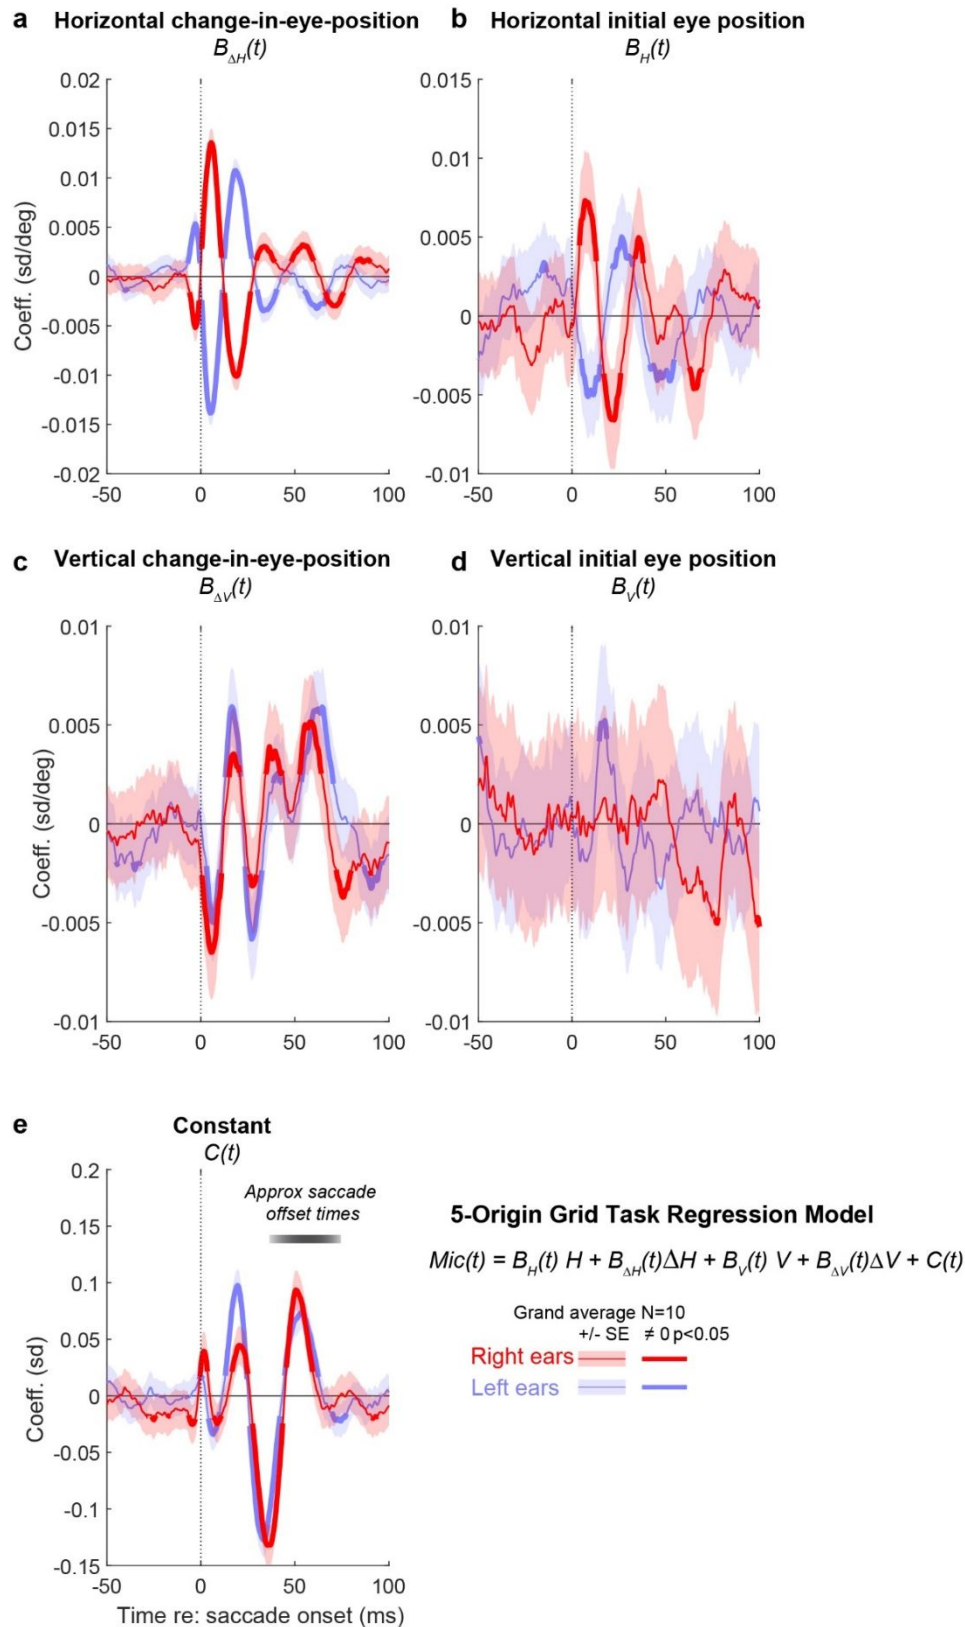

207

208 *Figure 4. Regression analysis of EMREOs shows contributions from multiple*  
209 *aspects of eye movement: horizontal and vertical change-in-eye-position (A, C),*  
210 *horizontal initial eye position (B), as well as a constant component that was consistent*  
211 *across saccades (E). The contribution of vertical initial eye position was weaker (D).*  
212 *The regression involved modeling the microphone signal at each time point, and each*  
213 *panel shows the time varying values of the coefficients associated with the different*  
214 *aspects of the eye movement (horizontal vs. vertical, change-in-position and initial*  
215 *position). The regressions were fit to individual subjects' microphone recordings, and*  
216 *plotted here as grand averages of these regression coefficients across the N=10*  
217 *subjects tested in the 5-origin grid task. Microphone signals were z-scored in reference*  
218 *to baseline variability during a period -150 to 120 ms prior to saccade onset. Results are*  
219 *presented in units of standard deviation (panel e) or standard deviation per degree*  
220 *(panels a-d). Shaded areas represent +/-SEM.*

221  
222 Finally, there is a constant term that is similar in the two ears and is larger later in  
223 the saccade than early in the saccade (Figure 4E). As noted above, this constant term  
224 can be thought of as encapsulating the average EMREO waveform that occurs when  
225 pooling across all the eye movements in the dataset, regardless of their initial positions  
226 or horizontal or vertical components.

227 The basic regression model assumes a roughly linear relationship between the  
228 contributions of the horizontal and vertical dimensions of the eye movements – but is  
229 this appropriate? To test this, we collected data using two simplified tasks, the single-  
230 origin-grid task (with a single initial fixation in the center, Figure 1C) and the  
231 horizontal/vertical task (with fixation-target pairs on the horizontal and vertical  
232 meridians, generating purely horizontal or vertical saccades, Figure 1D). We sought to  
233 determine if we could predict an EMREO associated with an oblique eye displacement  
234 using the corresponding components of purely horizontal and purely vertical eye  
235 movements. Ten subjects (four of whom also completed the 5-origin grid task)  
236 completed both the single-origin grid task and the horizontal/vertical saccade. We fit the  
237 results from these tasks using the same regression procedure but omitting the initial  
238 fixation position terms, i.e.:

$$239 \quad \text{Mic}(t) = B_{\Delta H}(t) \Delta H + B_{\Delta V}(t) \Delta V + C(t) \quad \text{Eq 2}$$

240 As shown in Figure 5, both tasks yield similar values of the regression  
241 coefficients for horizontal change-in-position ( $B_{\Delta H}(t)$ ) and the constant term ( $C(t)$ ) (grand

242 average across the population, black vs. green traces). The vertical change-in-position  
243 term ( $B_{\Delta V}(t)$ ) was slightly more variable but also quite consistent across tasks.

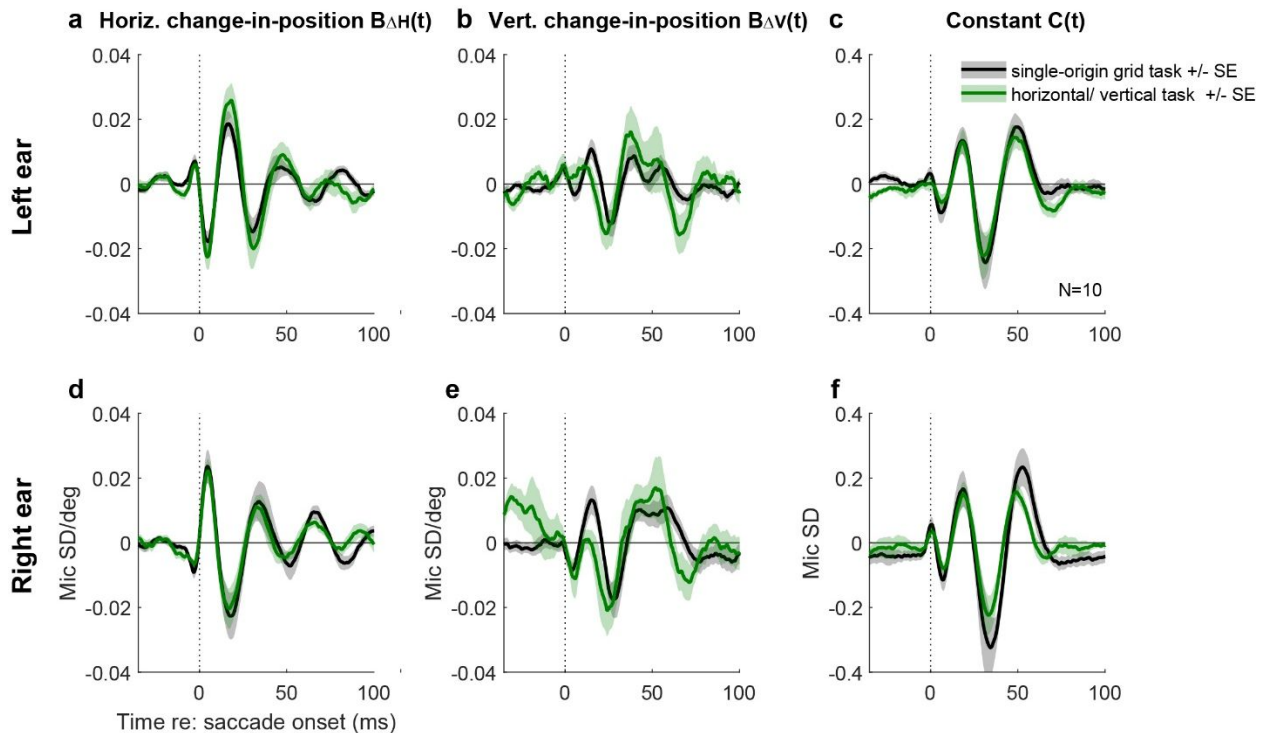

244  
245

246

247 *Figure 5. Different tasks generate similar regression coefficient curves. Grand*  
248 *average of the regression results for the single-origin grid (black lines) and*  
249 *horizontal/vertical (green lines) tasks. The lines and shading represent the average and*  
250 *standard error of the coefficient values across the same 10 subjects for the two tasks.*

251

252 Given the consistency of the regression coefficient values between the single-  
253 origin grid and horizontal/vertical tasks, we surmised that it should be possible to use  
254 the *coefficient* values from one task to predict the EMREO *waveforms* in the other.  
255 Specifically, we used the time-varying regression values from the horizontal/vertical task  
256 to predict the observed waveforms from the single origin grid task.

257 The black traces in Figure 6 show the grand average microphone signals  
258 associated with each target in the single-origin grid task. The location of each trace  
259 corresponds to the physical location of the associated target in the grid task (similar to  
260 Figure 2). The superimposed predicted wave forms (red traces) were generated from

261 the  $B_{\Delta H}(t)$ ,  $B_{\Delta V}(t)$ , and  $C(t)$  regression coefficients fit to only the horizontal/vertical data,  
 262 then evaluated at each target location and moment in time to produce predicted curves  
 263 for each of the locations tested in the grid task.

264

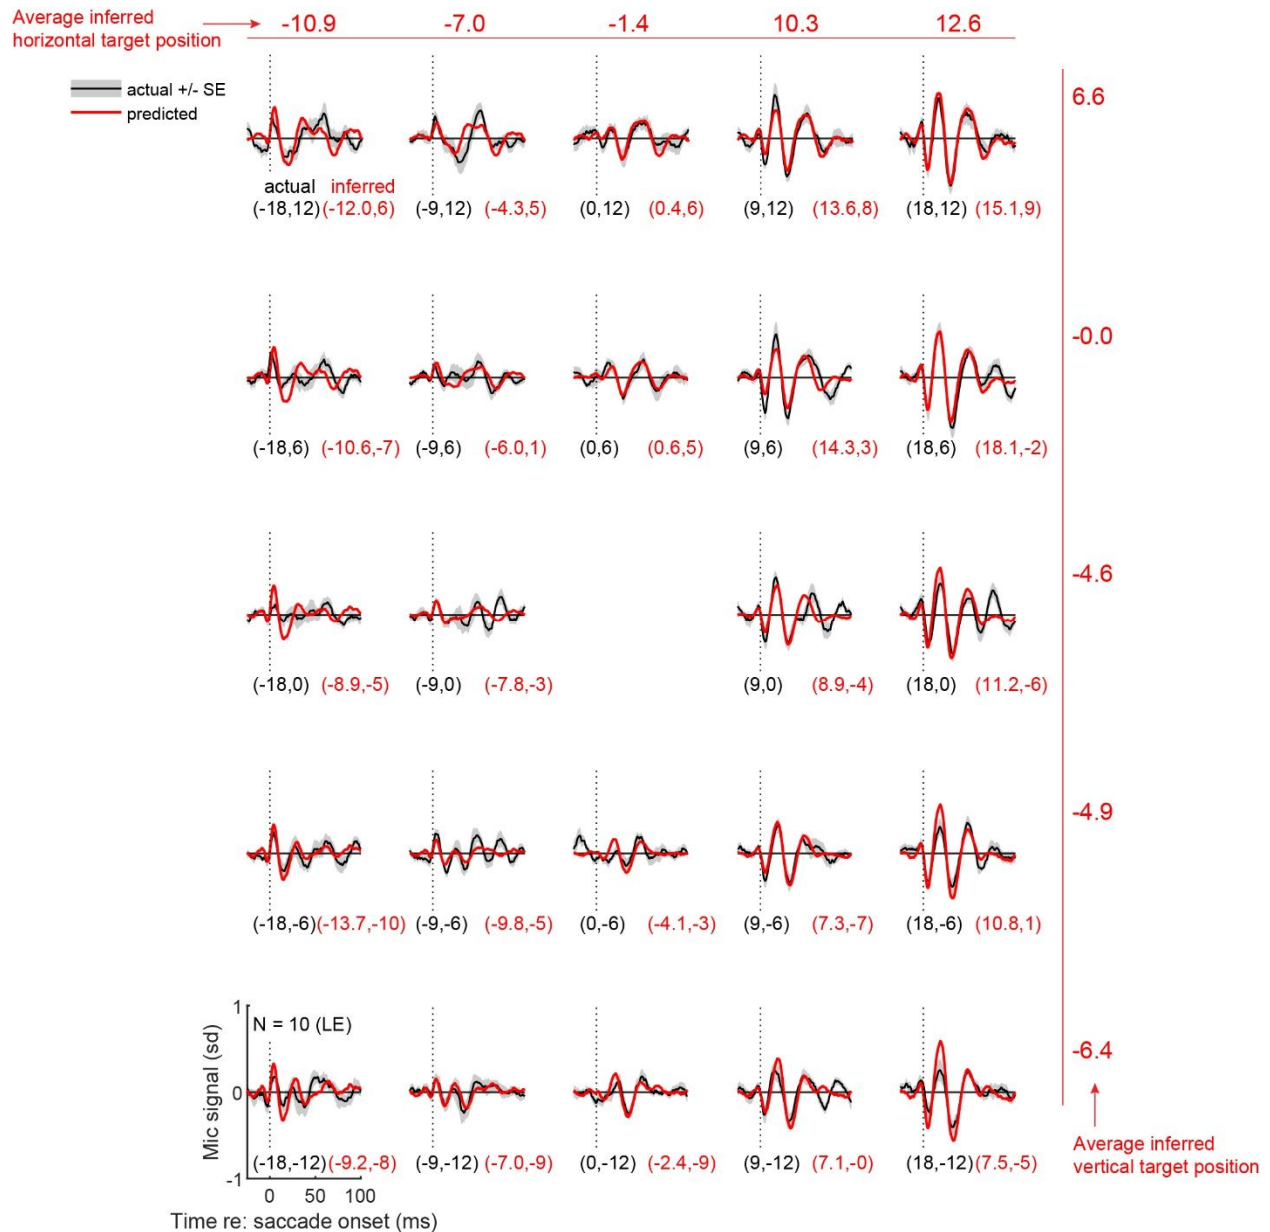

265

266 *Figure 6. Regression coefficients fit to microphone recordings from the*  
 267 *horizontal/vertical-saccade task can be used to predict the waveforms observed in the*  
 268 *grid task and their corresponding target locations. Combined results for all N=10*  
 269 *participants' left ears. The black traces indicate the grand average of all the individual*  
 270 *participants' mean microphone signals during the single-origin grid task, with the*  
 271 *shading indicating +/- the standard error across participants. The red traces show an*  
 272 *estimate of the EMREO at that target location based only on regression coefficients*

273 *measured from the horizontal/vertical task. Black values in parentheses are the actual*  
274 *horizontal and vertical coordinates for each target in the grid task. Corresponding red*  
275 *values indicate the inferred target location based on solving a multivariate regression*  
276 *which fits the observed grid task microphone signals in a time window (-5 to 70 ms with*  
277 *respect to saccade onset) to the observed regression weights from the*  
278 *horizontal/vertical task for each target location. The averages of these values in the*  
279 *horizontal and vertical dimensions are shown across the top and right sides. See*  
280 *Figure 7 for additional plots of the inferred vs actual target values, and Supplementary*  
281 *Figure 3 for corresponding right-ear data.*

282 Overall, there is good correspondence between the predicted EMREO  
283 oscillations and the observed EMREO from actual microphone recordings, including the  
284 oblique target locations that were not tested in the horizontal/vertical task. This  
285 illustrates two things: 1) the EMREO is reproducible across task contexts, and 2) the  
286 horizontal and vertical change-in-position contributions interact in a reasonably linear  
287 way, so that the EMREO signal observed for a combined horizontal-vertical saccade  
288 can be predicted as the sum of the signals observed for purely horizontal and purely  
289 vertical saccades with the corresponding component amplitudes.

290 Given that it is possible to predict the microphone signal from one task context to  
291 another, it should also be possible to decode the target location and its associated eye  
292 movement from just the simultaneously-recorded microphone signal. To do this, we  
293 again used the weights from the horizontal/vertical task data for the regression  
294 equation:

$$295 \quad \text{Mic}(t) = B_{\Delta H}(t) \Delta H + B_{\Delta V}(t) \Delta V + C(t) \quad \text{Eq 2}$$

296 We then used the Mic(t) values observed in the single-origin grid task to solve this  
297 system of multivariate linear equations across the time window -5 to 70 ms with respect  
298 to the saccade (a time period in which the EMREO appears particularly consistent and  
299 substantial in magnitude) to generate the “read out” values of  $\Delta H$  and  $\Delta V$  associated  
300 with each target’s actual  $\Delta H$  and  $\Delta V$ . We conducted this analysis on the left ear and  
301 right ear data separately. The left ear results of this analysis are seen in each of the  
302 individual panels of Figure 6; the black values (e.g. -18, 12) indicate the actual  
303 horizontal and vertical locations of the target, and the associated red values indicate the  
304 inferred location of the target. Across the top of the figure, the numbers indicate the  
305 average inferred horizontal location, and down the right side, the numbers indicate the

306 average inferred vertical location. These results indicate that, on average, the targets  
307 can be read out in the proper order, but the spatial scale is compressed: the average  
308 read-out values for the +/-18 degree horizontal targets are +/- ~11-12 degrees, and the  
309 averages for the vertical +/- 12 degree targets are +/- ~6-7 degrees. Similar findings  
310 applied to the right ear data (Supplementary Figure 3).

311 Plots of these target readouts in both horizontal and vertical dimensions for both  
312 ears are shown in Figure 7A-F. Figure 7A shows the inferred location of the target (red  
313 dots) connected to the actual location of the target (black dots) using the data from  
314 Figure 6, i.e the left ear readout, and Figure 7B-C show regressions of these target  
315 readouts as a function of the horizontal and vertical locations. Figure 7D-F show the  
316 corresponding results for the right ears. Altogether, these figures illustrate that the  
317 readout accuracy is better in the horizontal than in the vertical dimensions.

318 Quantitatively, the  $r^2$  values for the horizontal dimension were 0.89 (LE) and 0.91 (RE),  
319 and the corresponding values for the vertical dimension were 0.61 (LE) and 0.67 (RE).  
320 Slopes were also closer to a value of 1 for the horizontal dimension (0.71, LE; 0.77, RE)  
321 than for the vertical dimension (0.51, LE, 0.51, RE). for left and right ears alone are  
322 shown in Figure 7A-F.

323 Given that it is known that the brain uses binaural computations for  
324 reconstructing auditory space, we wondered whether the accuracy of this read-out could  
325 be improved by combining signals recorded in each ear simultaneously. We first  
326 considered a binaural difference computation, subtracting the right ear microphone  
327 recordings from the left, thus eliminating the part of the signal that is common between  
328 the two ears. Figure 7G shows the results. Generally, the horizontal dimension is well  
329 ordered whereas the vertical dimension continues to show considerable shuffling. This  
330 can also be seen in Figure 7H and 7I, which show the relationship between the inferred  
331 target location and the true target location, plotted on the horizontal and vertical  
332 dimension, respectively. The correlation between inferred and actual target is higher in  
333 the horizontal dimension ( $r^2$  0.95) than the vertical dimension ( $r^2$  0.41), which is actually  
334 worse than the monaural readouts. This makes sense because the binaural difference  
335 computation serves to diminish the contribution from aspects of the signal that are in  
336 phase across the two ears, such as the dependence on vertical change in eye position.  
337 We then reasoned that improvement in the vertical readout could be achieved by

338 instead averaging (rather than subtracting) the signals across the two ears, and indeed  
 339 this is so. Averaging across the two ears produces an improved vertical readout ( $r^2$   
 340 0.73, Figure 7K). A hybrid readout operation in which the horizontal location is  
 341 computed from the binaural difference, and the vertical location is computed from the  
 342 binaural average, produces a modest improvement in the overall reconstruction of  
 343 target location (Figure 7J). Overall, these results parallel human sound localization  
 344 which relies on a binaural difference computation in the horizontal dimension (and is  
 345 more accurate in that dimension), vs. potentially monaural or averaged spectral cues for  
 346 the vertical dimension (which is less accurate) (Blauert, 1997; Groh, 2014).

347

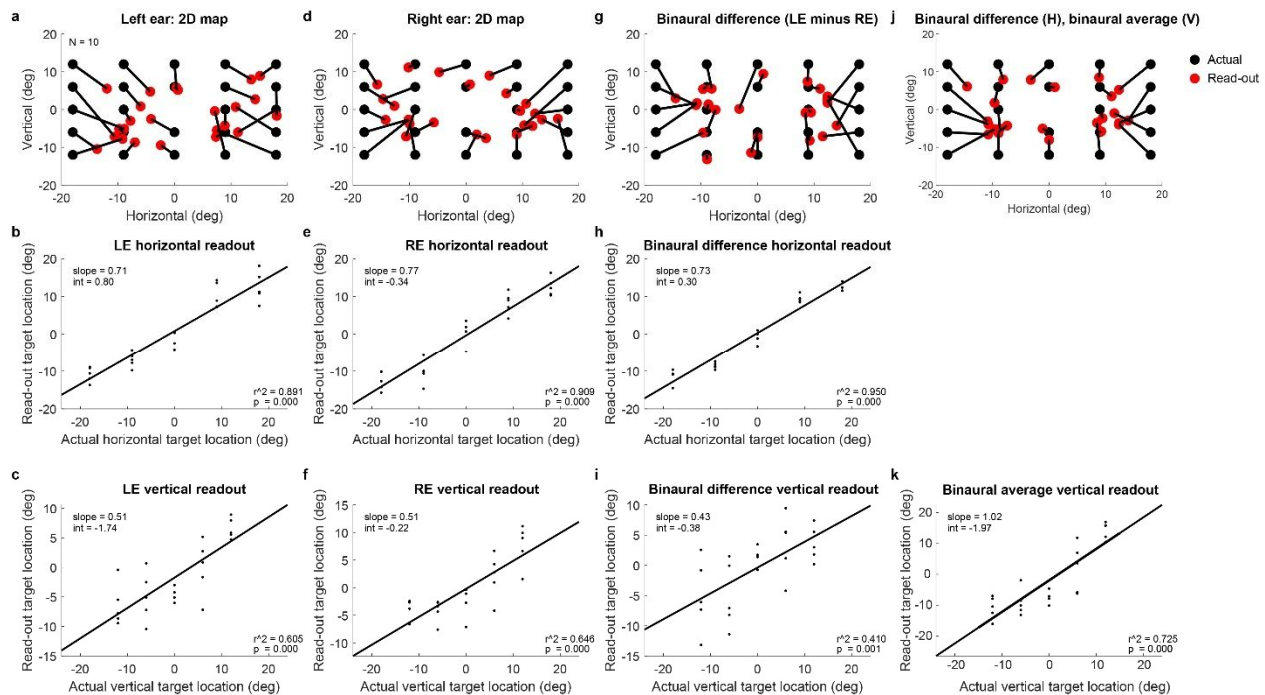

348

349 **Figure 7. Multiple ways of reading out target location from the ear canal recordings.** As  
 350 in Figure 6 and Supplementary Figure 3, the relationship between EMREOs and eye  
 351 movements was quantitatively modelled using Eq 2 and the ear canal data recorded in  
 352 the horizontal/vertical task. Inferred grid task target location was “read out” by solving  
 353 equation (2) for  $\Delta H$  and  $\Delta V$  using the coefficients as fit from the horizontal/vertical task  
 354 and the microphone values as observed in the single-origin grid task; see main text for  
 355 details. **a.** Inferred target location (red) compared to actual target location (black),  
 356 based on the left ear (same data as in Figure 6). **b.** Horizontal component of the read-  
 357 out target vs the actual horizontal component (left ear microphone signals). **c.** Same as  
 358 **(b)** but for the vertical component. **d-f.** Same as **A-C** but for the right ear. **g-i,** Same as  
 359 **a-c** and **d-f** but computed using the binaural difference between the microphone signals



360 (*left ear – right ear*). *j.*, *k.*. *A hybrid read-out model (j) using binaural difference in the*  
361 *horizontal dimension (h) and binaural average in the vertical dimension (k).*

## 362 Discussion

363 Sound locations are inferred from head-centered differences in sound arrival  
364 time, loudness, and spectral content, but visual stimulus locations are inferred from eye-  
365 centered retinal locations (Blauert, 1997; Groh, 2014). Information about eye  
366 movements with respect to the head/ears is critical for connecting the visual and  
367 auditory scenes to one another (Groh and Sparks, 1992). This insight has motivated a  
368 number of previous neurophysiological studies in various brain areas in monkeys and  
369 cats, all of which showed that changes in eye position affected the auditory response  
370 properties of at least some neurons in the brain area studied (Inferior colliculus: (Groh  
371 et al., 2001; Zwiers et al., 2004; Porter et al., 2006; Bulkin and Groh, 2012a, b) ;  
372 auditory cortex: (Werner-Reiss et al., 2003; Fu et al., 2004; Maier and Groh, 2010) ;  
373 superior colliculus: (Jay and Sparks, 1984, 1987b, a; Hartline et al., 1995; Zella et al.,  
374 2001; Populin et al., 2004; Lee and Groh, 2012) ; frontal eye fields: (Russo and Bruce,  
375 1994; Caruso et al., 2019) ; intraparietal cortex: (Stricanne et al., 1996; Cohen and  
376 Andersen, 2000; Mullette-Gillman et al., 2005, 2009)).

377 These findings raised the question of where signals related to eye movements  
378 first appear in the auditory processing stream. The discovery of EMREOs (Gruters et  
379 al., 2018) introduced the intriguing possibility that the computational process leading to  
380 visual-auditory integration might be manifest in the most peripheral part of the auditory  
381 system. Here we show that the signals present in the ear exhibit the properties  
382 necessary for playing a role in this process: these signals carry information about the  
383 horizontal and vertical components of eye movements, and display signatures related to  
384 both change-in-eye-position and the absolute position of the eyes in the orbits. Because  
385 of the parametric information present in the EMREO signal, we are able to predict  
386 EMREOs in one task from the eye movements recorded in another, and even predict  
387 the target of eye movements from the simultaneous EMREO recording.

388 Our present observations raise two key questions: what causes EMREOs and  
389 how do those mechanisms impact hearing/auditory processing? The proximate cause of

390 EMREOs is likely to be one or more of the known types of motor elements in the ear<sup>1</sup>:  
391 the middle ear muscles (stapedius and tensor tympani), which modulate the motion of  
392 the ossicles (Mendelson, 1957; Hung and Dallos, 1972; Gelfand, 1984), and the outer  
393 hair cells, which modulate the motion of the basilar membrane (Brownell et al., 1985).  
394 One or more of these elements may be driven by descending brain signals originating  
395 from within the oculomotor pathway and entering the auditory pathway somewhere  
396 along the descending stream that ultimately reaches the ear via the 5<sup>th</sup> (tensor tympani),  
397 7<sup>th</sup> (stapedius muscle), and/or 8<sup>th</sup> nerves (outer hair cells) (see refs: Galambos, 1956;  
398 Liberman and Guinan, 1998; Cooper and Guinan, 2006; Guinan, 2006; Mukerji et al.,  
399 2010; Guinan, 2014) for reviews). Efforts are currently underway in our laboratory to  
400 identify the specific EMREO generators/modulators (Schlebusch et al., 2019, 2020).

401         Uncovering the underlying mechanism should shed light on another question.  
402 Does the temporal pattern of the observed EMREO signal reflect the time course and  
403 nature of that underlying mechanism's impact on auditory processing? It is not clear  
404 how an oscillatory signal like the one observed here might contribute to hearing.  
405 However, it is also not clear that the underlying mechanism is, in fact, oscillatory.  
406 Microphones can only detect signals with oscillatory energy in the range of sensitivity of  
407 the microphone. It is possible that the observed oscillations reflect ringing associated  
408 with a change in some mechanical property of the transduction system, and that change  
409 could have a non-oscillatory temporal profile (Figure 8A). Of particular interest would be  
410 a ramp-to-step profile in which aspects of the middle or inner ear shift from one state to  
411 another during the course of a saccade and hold steady at the new state during the  
412 subsequent fixation period. This kind of temporal profile would match the time course of  
413 the saccade itself.

---

<sup>1</sup> We note that EMREOs are unlikely to be due to the actual sound of the eyes moving in the orbits. Our original study, Gruters et al (2018) showed that when microphone recordings are aligned on saccade offset (as opposed to onset, as we did here), EMREOs continue for at least several 10's of ms after the eyes have stopped moving. We also have unpublished observations in patients with various hearing abnormalities; EMREOs are altered in such patients despite normal eye movements.

a Temporal profiles of relevant events and signals

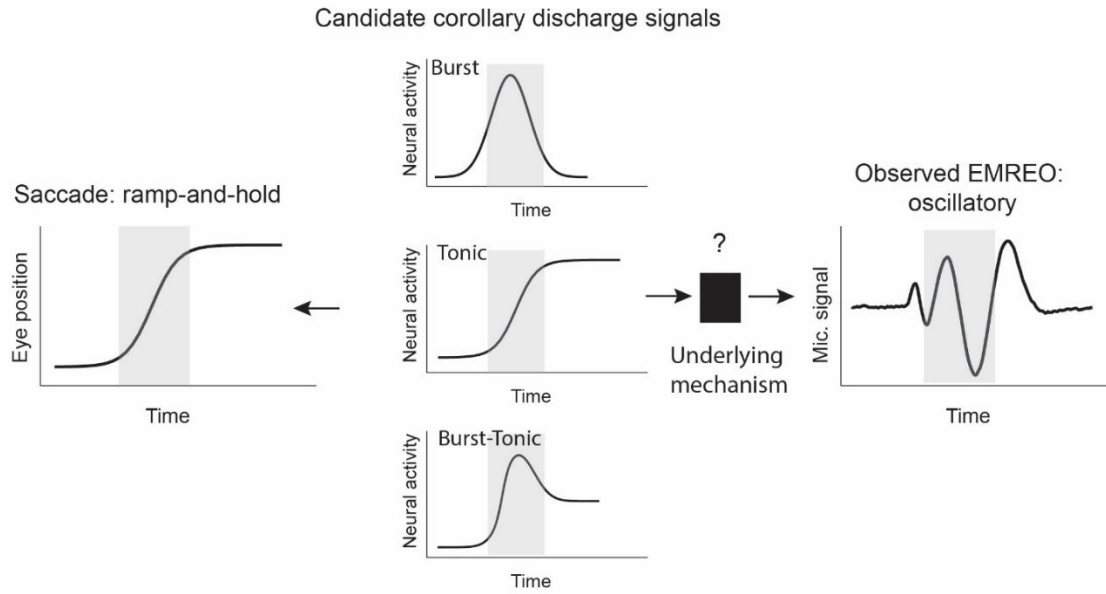

b Working conceptual model

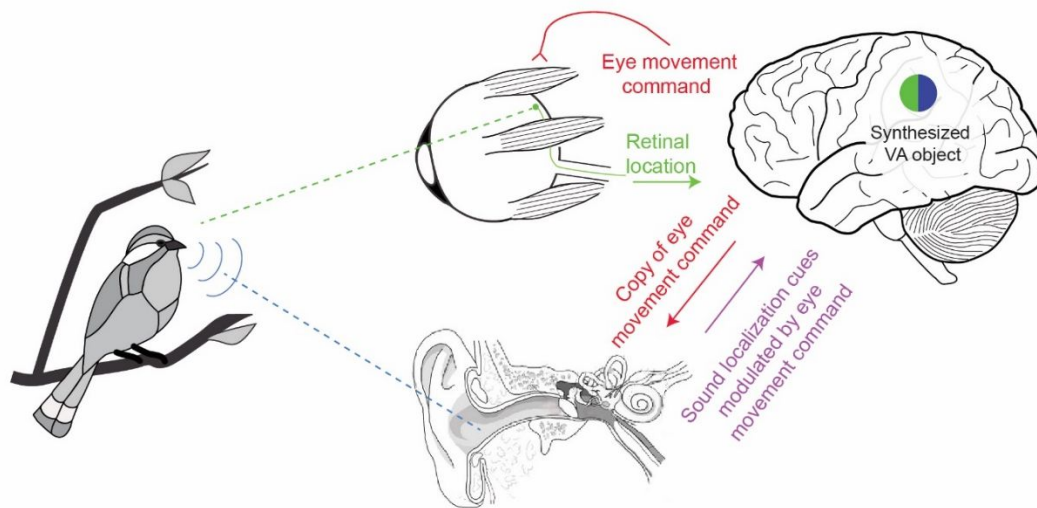

414

415 *Figure 8. Temporal profiles of relevant signals and working conceptual model for how*  
 416 *EMREOs might relate to our ability to link visual and auditory stimuli in space. A.*  
 417 *Temporal profiles of signals. The EMREO is oscillatory whereas the eye movement to*  
 418 *which it is synchronized involves a ramp-and-hold temporal profile. Candidate source*  
 419 *neural signals in the brain might exhibit a ramp-and-hold (tonic) pattern, suggesting a*  
 420 *ramp-and-hold-like underlying effect on an as-yet-unknown peripheral mechanism, or*  
 421 *could derive from other known temporal profiles including bursts of activity time-locked*  
 422 *to saccades. B. Working conceptual model. The brain causes the eyes to move by*  
 423 *sending a command to the eye muscles. Each eye movement shifts the location of*  
 424 *visual stimuli on the retinal surface. A copy, possibly a highly transformed one, of this*  
 425 *eye movement command is sent to the ear, altering ear mechanics in some unknown*  
 426 *way. When a sound occurs, the ascending signal to the brain will depend on the*  
 427 *combination of its location in head-centered space (based on the physical values of*

428 *binaural timing and loudness differences and spectral cues) and aspects of recent eye*  
429 *movements and fixation position. This hybrid signal could then be read-out by the brain.*

430 Available eye movement control signals in the oculomotor system include those  
431 that follow this ramp-and-hold temporal profile, or tonic activity that is proportional to eye  
432 position throughout periods of both movement and fixation. In addition to such tonic  
433 signals, oculomotor areas also contain neurons that exhibit burst patterns, or elevated  
434 discharge in association with the saccade itself, as well as combinations of burst and  
435 tonic patterns (for reviews, see Fuchs et al., 1985; Takahashi and Shinoda, 2018). It  
436 remains to be seen which of these signals or signal combinations might be sent to the  
437 auditory periphery and where they might come from. The paramedian pontine reticular  
438 formation (PPRF) is a strong candidate for a source, having been implicated in  
439 providing corollary discharge signals of eye movements in visual experiments (Sparks  
440 et al., 1987) (see also Guthrie et al., 1983), and containing each of these basic temporal  
441 signal profiles (Fuchs et al., 1985; Takahashi and Shinoda, 2018). Regardless of the  
442 source and nature of the descending corollary discharge signal, the oscillations  
443 observed here should be thought of as possibly constituting a biomarker for an  
444 underlying, currently unknown, mechanism, rather than necessarily the effect itself.

445 Despite these critical unknowns, it is useful to articulate a working conceptual  
446 model of how EMREOs might facilitate visual and auditory integration (Figure 8B). The  
447 general notion is that, by sending a copy of each eye movement command to the motor  
448 elements of the auditory periphery, the brain keeps the ear informed about the current  
449 orientation of the eyes. If, as noted above, these descending oculomotor signals cause  
450 a ramp-to-step change in the state of tension of components within the EMREO  
451 pathway, time-locked to the eye movement and lasting for the duration of each fixation  
452 period, they would effectively change the transduction mechanism in an eye  
453 position/eye movement dependent fashion. In turn, these changes could affect the  
454 latency, gain, or frequency-filtering properties of the response to sound. Indeed,  
455 intriguing findings from Puria and colleagues (Cho et al., in revision) have recently  
456 indicated that the tension applied by the middle ear muscles likely affects all three of  
457 these aspects of sound transmission throughout the middle ear. In short, the signal  
458 sent to the brain in response to an incoming sound could ultimately reflect a mixture of

459 the physical cues related to the location of the sound itself - the ITD/ILD/spectral cues -  
460 and eye position/movement information.

461 Most neurophysiological studies report signals consistent with a hybrid code in  
462 which information about sound location is blended in a complex fashion with information  
463 about eye position and movement, both within and across neurons (Jay and Sparks,  
464 1984, 1987b; Groh et al., 2001; Porter et al., 2006; Maier and Groh, 2010; Lee and  
465 Groh, 2012; Caruso et al., 2019). Computational modeling confirms that, in principle,  
466 these complex signals can be “read out” to produce a signal of sound location with  
467 respect to the eyes (Groh et al., 2001). However, substantive differences do remain  
468 between the observations here and such neural studies, chiefly in that the neural  
469 investigations have focused primarily on periods of steady fixation. A more complete  
470 characterization of neural signals time-locked to saccades is therefore needed (Porter et  
471 al., 2007; Bulkin and Groh, 2012a).

472 Note that this working model differs from a spatial attention mechanism in which  
473 the brain might direct the ears to “listen” selectively to a particular location in space.  
474 Rather, under our working model, the response to sounds from any location would be  
475 impacted by peripheral eye movement/position dependence in a consistent fashion  
476 across all sound locations. However, such a system could well work in concert with  
477 top-down attention, which has previously been shown to impact outer hair cells even  
478 when participants are required to fixate and not make eye movements (Delano et al.,  
479 2007; Harkrider and Bowers, 2009; Srinivasan et al., 2012; Srinivasan et al., 2014;  
480 Walsh et al., 2014; Wittekindt et al., 2014; Walsh et al., 2015).

481 Another question concerns whether EMREOs might actually impair sound  
482 localization, specifically for brief sounds presented during an eye movement. We think  
483 the answer to this is no. Boucher et al (Boucher et al., 2001) reported that  
484 perisaccadic sound localization is quite accurate, which suggests that EMREOs (or their  
485 underlying mechanism) do not impair perception. This is an important insight because  
486 given the rate at which eye movements occur - about 3/sec – and with each associated  
487 EMREO signal lasting 100 ms or longer (due to extending past the end of saccades, as  
488 explored by Gruters, Murphy et al. 2018), it would be highly problematic if sounds could  
489 not be accurately detected or localized when they occur in conjunction with saccades.

490 If there is indeed a step-ramp system underlying the observed oscillations, then  
491 transduction of all sounds will be affected, regardless of when they occur with respect to  
492 saccades.

493 Overall, how brain-controlled mechanisms adjust the signaling properties of  
494 peripheral sensory structures is critical for understanding sensory processing as a  
495 whole. Auditory signals are known to adjust the sensitivity of the visual system via  
496 sound-triggered pupil dilation (Bala and Takahashi, 2000), indicating that  
497 communication between these two senses is likely to be a two-way street. The  
498 functional impact of such communication at low-level stages is yet to be fully explored  
499 and may have implications for how individuals compensate when the information from  
500 one sensory system is inadequate, either due to natural situations such as noisy sound  
501 environments or occluded visual ones, or due to physiological impairments in one or  
502 more sensory systems.

## 503 **Methods**

### 504 General

505 Healthy human subjects that were 18 years of age or older with no known  
506 hearing deficits or visual impairments beyond corrected vision were recruited from the  
507 surrounding campus community (N=16; 8 female, 8 male; female-male ratio was also  
508 equal in subgroups tested on different tasks). If subjects were unable to perform the  
509 saccade task without vision correction, they were excluded from the study. All study  
510 procedures involving subjects were approved by the Duke Institutional Review Board,  
511 and all subjects received monetary compensation for their participation.

512 Acoustic signals in both ear canals were measured simultaneously with Etymotic  
513 ER10B+ microphone systems coupled with ER2 earphones to allow calibrations of the  
514 microphones (However, note that no auditory stimuli were used during any of the  
515 saccade tasks in the current study) (Etymotic Research, Elk Grove Village, IL). A low-  
516 latency audio interface (Focusrite Scarlett 2i2, Focusrite Audio Engineering Ltd., High  
517 Wycombe, UK) was used for audio capture and playback through the Etymotic  
518 hardware at a sampling rate of 48kHz. Eye tracking was performed with an Eyelink  
519 1000 system sampling at 1000Hz. Stimulus presentation and data acquisition were

520 controlled through custom scripts and elements of The Psychophysics Toolbox in  
521 MATLAB, with visual stimuli presented on a large LED monitor.

522 In all experiments, eye position and microphone data were recorded while  
523 subjects performed silent, visually-guided saccade tasks. Experimental sessions were  
524 carried out in a darkened, acoustically isolated chamber made anechoic with the  
525 addition of acoustic damping wall tiles. Subjects were seated 70 cm from the screen,  
526 and a chin rest was used to maintain head position and minimize movement.

527 Experimental sessions were subdivided into multiple runs, approximately 5 minutes  
528 each. This provided subjects with the opportunity to take a brief break from the  
529 experiment if needed to maintain alertness or to address any possible discomfort from  
530 maintaining their posture. Each run typically consisted of approximately 125 trials and  
531 fixation positions and saccade targets were presented in pseudorandom order.

532 Before each experimental session, the eye-tracking system was calibrated using  
533 the calibration routine provided with the Eyelink system to register raw eye-tracking data  
534 to gaze locations on the stimulus presentation screen. If the subject requested an  
535 adjustment to the chin rest or left the recording chamber for a break, the eye-tracking  
536 calibration was repeated. Before each run, the microphone system was calibrated to  
537 ensure that each microphone had a frequency response that was similar to the pre-  
538 recorded frequency response of the microphones when placed in a volume that  
539 approximated the size and geometry of the human ear canal - a 3ml syringe cut to  
540 accept the Etymotic earpieces. The syringe stopper was pulled to 1.25 cm<sup>3</sup> to  
541 approximate the volume of the average adult human ear canal. A small amount of  
542 gauze (.25cm<sup>3</sup>) was added to the volume to emulate the attenuation caused by the soft  
543 tissue of the ear canal. The calibration routine played tones from 10 to 1600Hz, at a  
544 constant system output amplitude. As the purpose of this calibration was to compare  
545 microphone function in a control volume with that in an earpiece just placed in a subject,  
546 the weighting of the tones was not specifically calibrated. If the input-output results of  
547 the same tone sequences were consistent between ears and matched the overall shape  
548 of the syringe calibration curves, microphone placement was considered successful.  
549 No sounds were delivered during periods of experimental data collection.

550

551 Task descriptions

552 All tasks followed the same stimulus timing sequence: initial fixation points were  
553 displayed on screen for 750ms and then removed as the saccade targets were  
554 presented for 750ms (Figure 1A). Fixation and target locations were indicated by green  
555 dots. Subjects were instructed to fixate on the initial fixation locations until targets were  
556 presented on the screen, then to saccade to the targets and fixate on the targets until  
557 they changed from green to red for the last 100ms of the target presentation (the color  
558 cue was intended to help subjects maintain fixation through the end of the target  
559 presentation). Inter-trial-intervals were jittered  $350 \pm 150$ ms. This was done to minimize  
560 the potential impact of non-saccade related noise signals that may be periodic (i.e.  
561 heartbeat, external acoustic and electromagnetic sources).

562 In the five-origin grid task (Figure 1B), participants performed saccades to  
563 multiple targets from five different initial eye positions in a plus-shaped configuration at -  
564  $9^\circ$ ,  $0^\circ$ , and  $+9^\circ$  horizontally and at  $-6^\circ$ ,  $0^\circ$ , and  $6^\circ$  of elevation as shown. Twenty five  
565 saccade targets ranged from  $-18^\circ$  to  $+18^\circ$  in  $9^\circ$  degree increments horizontally and from  
566  $-12^\circ$  to  $+12^\circ$  in  $6^\circ$  increments vertically.

567 In the horizontal/vertical task (Figure 1D), participants performed saccades to  
568 targets along the vertical and horizontal axes from a central fixation. Vertical targets  
569 ranged from  $-12^\circ$  to  $+12^\circ$  in  $3^\circ$  increments and horizontal targets ranged from  $-18^\circ$  to  
570  $+18^\circ$  in  $3^\circ$  increments.

571 In the single-origin grid task (Figure 1C), participants made saccades to 24  
572 distinct targets of varying vertical and horizontal placement combinations from a central  
573 fixation. Horizontal location components ranged from  $-18^\circ$  to  $+18^\circ$  in  $9^\circ$  increments and  
574 vertical location components ranged from  $-12^\circ$  to  $+12^\circ$  in  $6^\circ$  increments.

575

576

577 Preprocessing analysis

578 Saccade-microphone synchronization:

579 Microphone data was synchronized to the onset the saccade from the fixation point to  
580 the target. This was defined based on the third derivative of eye position, or jerk. The  
581 first peak in the jerk represents the moment when the change in the eye acceleration is  
582 greatest. Prior to each differentiation, a lowpass discrete filter with a 7ms window was



583 used to smooth the data and reduce the effects of noise and quantization error. This  
584 filter was normalized, such that its output to a constant series of values equaled those  
585 values.

586

#### 587 Trial exclusion criteria:

588 Trials were excluded based on saccade performance and the quality of microphone  
589 recordings. Exclusion criteria used for eye tracking: 1) if subjects made a sequence of  
590 two or more saccades to achieve the target; 2) if the eye tracking signal dropped out  
591 during the trial (e.g. due to blinks); 3) if the eye movement was slow and drifting, rather  
592 than a saccade; 4) if the saccade curved by more than  $4.5^\circ$  (subtended angle); or 5)  
593 subjects failed to maintain 200ms of fixation before and after the saccade. 6) If eye  
594 tracking dropped samples that prevented the calculation of the saccade onset time. On  
595 average these saccade-related exclusion criteria resulted in the exclusion of about 12%  
596 of the trials.

597 Prior to any further analysis, microphone data was downsampled from 48 kHz to  
598 2 kHz sampling rate to reduce processing time given that the previously observed eye-  
599 movement related signals of interest are well below 100 Hz (Gruters et al., 2018).

600 Exclusion based on noise in the microphone recordings was minimal. Within each block  
601 of trials, the mean and standard deviation of the RMS values for each trial was  
602 calculated. Individual trials were excluded if the microphone signal on that trial  
603 contained any individual values that were more than 10 standard deviations away from  
604 that mean. This typically resulted in the exclusion of  $< \sim 2\%$  of the trials, after  
605 application of the eye position screen described above.

606

#### 607 Z scoring

608 To facilitate comparison across subjects, sessions, and experiments, all microphone  
609 data reported in this study was z-scored within blocks and prior to the application of the  
610 exclusion criteria described above. The mean and standard deviation of the  
611 microphone values in a window -150 to -120 ms prior to saccade onset were used as  
612 the normalization baseline period.

613

## 614 Regression Analyses

615 Regression was used to assess how EMREOs vary with both eye position and  
616 eye movement. The microphone signal at each moment in time  $Mic(t)$  was fit as  
617 follows:

$$618 \quad Mic(t) = B_H(t) H + B_{\Delta H}(t) \Delta H + B_V(t) V + B_{\Delta V}(t) \Delta V + C(t) \quad (1)$$

619 where  $H$  and  $V$  correspond to the initial horizontal and vertical eye position and  $\Delta H$  and  
620  $\Delta V$  correspond to the respective changes in position associated with that trial. The  
621 slope coefficients  $B_H$ ,  $B_{\Delta H}$ ,  $B_V$ ,  $B_{\Delta V}$  are time-varying and reflect the dependence of the  
622 microphone signal on the respective eye movement parameters. The term  $C(t)$   
623 contributes a time-varying “constant” independent of eye movement metrics, and can be  
624 thought of as the best fitting average oscillation across all eye positions and  
625 displacements.

626 The term  $C(t)$  was included for all regressions, but other parameters were  
627 omitted when not relevant. Specifically, for the single-origin grid tasks and horizontal-  
628 vertical tasks, the model used vertical and horizontal saccade displacement ( $B_{\Delta H}(t) \Delta H$ ,  
629  $B_{\Delta V}(t) \Delta V$ ) as regression variables but not  $B_H(t) H$  or  $B_V(t) V$  as initial position did not  
630 vary for those tasks. The analysis produced values for the intercept and variable  
631 weights (or slopes), their 95% confidence intervals,  $R^2$ , and p-value for each time point.

632 For most analyses, the measured eye positions/changes-in-eye positions were  
633 used as the independent variables, so as to incorporate any variability due to scatter in  
634 fixation or saccade endpoint. For the target readout analysis described in Figures 6 and  
635 7, the horizontal and vertical positions of the targets, rather than the associated eye  
636 movements, were used.

## 637 References

- Bala AD, Takahashi TT (2000) Pupillary dilation response as an indicator of auditory discrimination in the barn owl. *J Comp Physiol [A]* 186:425-434.
- Barczak A, Haegens S, Ross DA, McGinnis T, Lakatos P, Schroeder CEJCr (2019) Dynamic modulation of cortical excitability during visual active sensing. 27:3447-3459. e3443.
- Blauert J (1997) *Spatial hearing*. Cambridge, MA: MIT Press.
- Boucher L, Groh JM, Hughes HC (2001) Afferent delays and the mislocalization of perisaccadic stimuli. *Vision Research* 41:2631-2644.

- Brownell WE, Bader CR, Bertrand D, de Ribaupierre Y (1985) Evoked mechanical responses of isolated cochlear outer hair cells. *Science* 227:194-196.
- Bulkin DA, Groh JM (2012a) Distribution of eye position information in the monkey inferior colliculus. *J Neurophysiol* 107:785-795.
- Bulkin DA, Groh JM (2012b) Distribution of visual and saccade related information in the monkey inferior colliculus. *Front Neural Circuits* 6:61.
- Caruso VC, Pages DS, Sommer MA, Groh JM (2019) Compensating for a shifting world: A quantitative comparison of the reference frame of visual and auditory signals across three multimodal brain areas. [bioRxiv:669333](https://doi.org/10.1101/2019.06.06.669333).
- Caruso VC, Pages DS, Sommer MA, Groh JM (2021) Compensating for a shifting world: evolving reference frames of visual and auditory signals across three multimodal brain areas. *J Neurophysiol* 126:82-94.
- Cho NH, Ravicz ME, Puria S (in revision) Human Middle-Ear Muscle Pulls Change Tympanic-Membrane Shape and Low-Frequency Middle-Ear Transmission Delays and Magnitudes. *Hear Res* in revision.
- Cohen YE, Andersen RA (2000) Reaches to sounds encoded in an eye-centered reference frame. *Neuron* 27:647-652.
- Cooper NP, Guinan JJ, Jr. (2006) Efferent-mediated control of basilar membrane motion. *J Physiol* 576:49-54.
- Delano PH, Elgueda D, Hamame CM, Robles L (2007) Selective attention to visual stimuli reduces cochlear sensitivity in chinchillas. *J Neurosci* 27:4146-4153.
- Fu KM, Shah AS, O'Connell MN, McGinnis T, Eckholdt H, Lakatos P, Smiley J, Schroeder CE (2004) Timing and laminar profile of eye-position effects on auditory responses in primate auditory cortex. *J Neurophysiol* 92:3522-3531.
- Fuchs AF, Kaneko CR, Scudder CA (1985) Brainstem control of saccadic eye movements. *Annu Rev Neurosci* 8:307-337.
- Galambos R (1956) Suppression of auditory nerve activity by stimulation of efferent fibers to cochlea. *J Neurophysiol* 19:424-437.
- Gallagher L, Diop M, Olson ES (2021) Time-domain and frequency-domain effects of tensor tympani contraction on middle ear sound transmission in gerbil. *Hear Res* 405:108231.
- Gelfand SA (1984) The contralateral acoustic reflex. In: *The acoustic reflex: Basic principles and clinical applications* pp 137-186. New York, NY: Academic Press.
- Groh JM (2014) *Making space: how the brain knows where things are*. Cambridge, MA: Harvard University Press.
- Groh JM, Sparks DL (1992) Two models for transforming auditory signals from head-centered to eye-centered coordinates. *Biological Cybernetics* 67:291-302.
- Groh JM, Trause AS, Underhill AM, Clark KR, Inati S (2001) Eye position influences auditory responses in primate inferior colliculus. *Neuron* 29:509-518.
- Gruters KG, Murphy DLK, Jenson CD, Smith DW, Shera CA, Groh JM (2018) The eardrums move when the eyes move: A multisensory effect on the mechanics of hearing. *Proc Natl Acad Sci U S A* 115 E1309-E1318.
- Guinan JJ, Jr. (2006) Olivocochlear efferents: anatomy, physiology, function, and the measurement of efferent effects in humans. *Ear Hear* 27:589-607.
- Guinan JJ, Jr. (2014) Cochlear mechanics, otacoustic emissions, and medial olivocochlear efferents: Twenty years of advances and controversies along with areas ripe for new work. In: *Perspectives on Auditory Research*, pp 229-246. New York: Springer.
- Guthrie BL, Porter JD, Sparks DL (1983) Corollary discharge provides accurate eye position information to the oculomotor system. *Science* 221:1193-1195.
- Harkrider AW, Bowers CD (2009) Evidence for a cortically mediated release from inhibition in the human cochlea. *J Am Acad Audiol* 20:208-215.
- Hartline PH, Vimal RL, King AJ, Kurylo DD, Northmore DP (1995) Effects of eye position on auditory localization and neural representation of space in superior colliculus of cats. *Exp Brain Res* 104:402-408.

- Hebrank J, Wright D (1974a) Are two ears necessary for localization of sound sources on the median plane? *J Acoust Soc Am* 56:935-938.
- Hebrank J, Wright D (1974b) Spectral cues used in the localization of sound sources on the median plane. *J Acoust Soc Am* 56:1829-1834.
- Hung IJ, Dallos P (1972) Study of the acoustic reflex in human beings. I. Dynamic characteristics. *J Acoust Soc Am* 52:1168-1180.
- Jay MF, Sparks DL (1984) Auditory receptive fields in primate superior colliculus shift with changes in eye position. *Nature* 309:345-347.
- Jay MF, Sparks DL (1987a) Sensorimotor integration in the primate superior colliculus. I. Motor convergence. *J Neurophysiol* 57:22-34.
- Jay MF, Sparks DL (1987b) Sensorimotor integration in the primate superior colliculus. II. Coordinates of auditory signals. *J Neurophysiol* 57:35-55.
- Lee J, Groh JM (2012) Auditory signals evolve from hybrid- to eye-centered coordinates in the primate superior colliculus. *J Neurophysiol* 108:227-242.
- Lieberman MC, Guinan JJ, Jr. (1998) Feedback control of the auditory periphery: anti-masking effects of middle ear muscles vs. olivocochlear efferents. *J Commun Disord* 31:471-482; quiz 483; 553.
- Macpherson EA, Sabin AT (2013) Vertical-plane sound localization with distorted spectral cues. *Hear Res* 306:76-92.
- Maier JX, Groh JM (2010) Comparison of gain-like properties of eye position signals in inferior colliculus versus auditory cortex of primates. *Frontiers in Integrative Neuroscience* 4:121-132.
- Mendelson ES (1957) A sensitive method for registration of human intratympanic muscle reflexes. *J Appl Physiol* 11:499-502.
- Metzger RR, Mulette-Gillman OA, Underhill AM, Cohen YE, Groh JM (2004) Auditory saccades from different eye positions in the monkey: implications for coordinate transformations. *J Neurophysiol* 92:2622-2627.
- Middlebrooks JC, Green DM (1991) Sound localization by human listeners. *Annu Rev Psychol* 42:135-159.
- Mukerji S, Windsor AM, Lee DJ (2010) Auditory brainstem circuits that mediate the middle ear muscle reflex. *Trends Amplif* 14:170-191.
- Mulette-Gillman OA, Cohen YE, Groh JM (2005) Eye-centered, head-centered, and complex coding of visual and auditory targets in the intraparietal sulcus. *J Neurophysiol* 94:2331-2352.
- Mulette-Gillman OA, Cohen YE, Groh JM (2009) Motor-related signals in the intraparietal cortex encode locations in a hybrid, rather than eye-centered, reference frame. *Cerebral Cortex* 19:1761-1775.
- O'Connell MN, Barczak A, McGinnis T, Mackin K, Mowery T, Schroeder CE, Lakatos PJI (2020) The role of motor and environmental visual rhythms in structuring auditory cortical excitability. *Cerebral Cortex* 30:101374.
- Populin LC, Tollin DJ, Yin TC (2004) Effect of eye position on saccades and neuronal responses to acoustic stimuli in the superior colliculus of the behaving cat. *J Neurophysiol* 92:2151-2167.
- Porter KK, Metzger RR, Groh JM (2006) Representation of eye position in primate inferior colliculus. *J Neurophysiol* 95:1826-1842.
- Porter KK, Metzger RR, Groh JM (2007) Visual- and saccade-related signals in the primate inferior colliculus. *Proceedings of the National Academy of Sciences of the United States of America* 104:17855-17860.
- Russo GS, Bruce CJ (1994) Frontal eye field activity preceding aurally guided saccades. *J Neurophysiol* 71(3):1250-1253.
- Schlebusch SN, Cooper MW, Kaylie DM, King CD, Murphy DLK, Shera CA, Groh JM (2019) Changes in saccade-related eardrum oscillations after surgical denervation of the stapedius muscle. *Soc Neurosci Abstr*.
- Schlebusch SN, Cooper MW, Kaylie DM, King CD, Murphy DLK, Shera CA, Groh JM (2020) Changes in saccade-related eardrum oscillations after surgical denervation of the stapedius muscle. *Association for Research in Otolaryngology Abstracts*.
- Sparks DL, Mays LE, Porter JD (1987) Eye movements induced by pontine stimulation: interaction with visually triggered saccades. *J Neurophysiol* 58:300-318.

- Srinivasan S, Keil A, Stratis K, Woodruff Carr KL, Smith DW (2012) Effects of cross-modal selective attention on the sensory periphery: cochlear sensitivity is altered by selective attention. *Neuroscience* 223:325-332.
- Srinivasan S, Keil A, Stratis K, Osborne AF, Cerwonka C, Wong J, Rieger BL, Polcz V, Smith DW (2014) Interaural attention modulates outer hair cell function. *Eur J Neurosci* 40:3785-3792.
- Stricanne B, Andersen RA, Mazzone P (1996) Eye-centered, head-centered, and intermediate coding of remembered sound locations in area LIP. *J Neurophysiol* 76:2071-2076.
- Takahashi M, Shinoda Y (2018) Brain Stem Neural Circuits of Horizontal and Vertical Saccade Systems and their Frame of Reference. *Neuroscience* 392:281-328.
- Walsh KP, Pasanen EG, McFadden D (2014) Selective attention reduces physiological noise in the external ear canals of humans. I: auditory attention. *Hear Res* 312:143-159.
- Walsh KP, Pasanen EG, McFadden D (2015) Changes in otoacoustic emissions during selective auditory and visual attention. *J Acoust Soc Am* 137:2737-2757.
- Werner-Reiss U, Kelly KA, Trause AS, Underhill AM, Groh JM (2003) Eye position affects activity in primary auditory cortex of primates. *Current Biology* 13:554-562.
- Wittekindt A, Kaiser J, Abel C (2014) Attentional modulation of the inner ear: a combined otoacoustic emission and EEG study. *J Neurosci* 34:9995-10002.
- Zella JC, Brugge JF, Schnupp JW (2001) Passive eye displacement alters auditory spatial receptive fields of cat superior colliculus neurons. *Nat Neurosci* 4:1167-1169.
- Zwiers MP, Versnel H, Van Opstal AJ (2004) Involvement of monkey inferior colliculus in spatial hearing. *J Neurosci* 24:4145-4156.

## Supplementary Figures

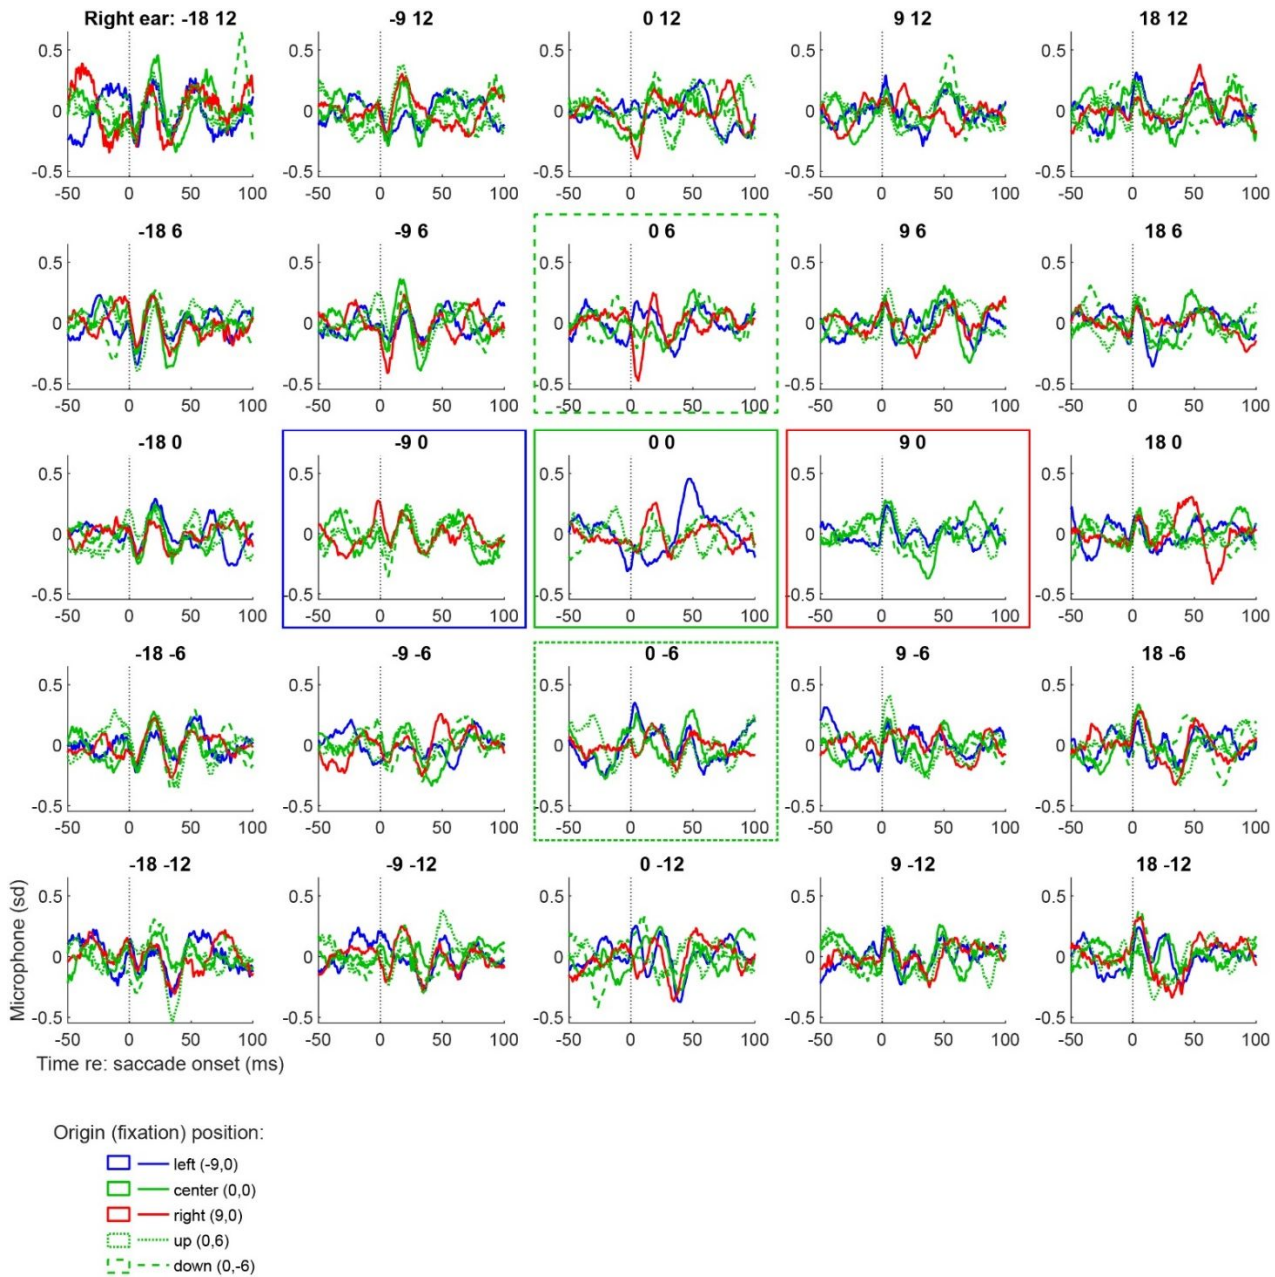

**Supplementary Figure 1.** Grand average EMREOs recorded during the 5-origin grid task in right ears of ten subjects. Same format as Figure 2: Each panel is the grand average EMREO signal (average of the individual subject averages) that is generated when a saccade is made to that location on the screen e.g. the top right panel involves saccades to the top right target location. The color and line styles of each trace correspond to the initial fixation point as indicated by boxes of the same color and line style; e.g. all red oscillations are generated during a simultaneous saccade that originated from the right fixation point.

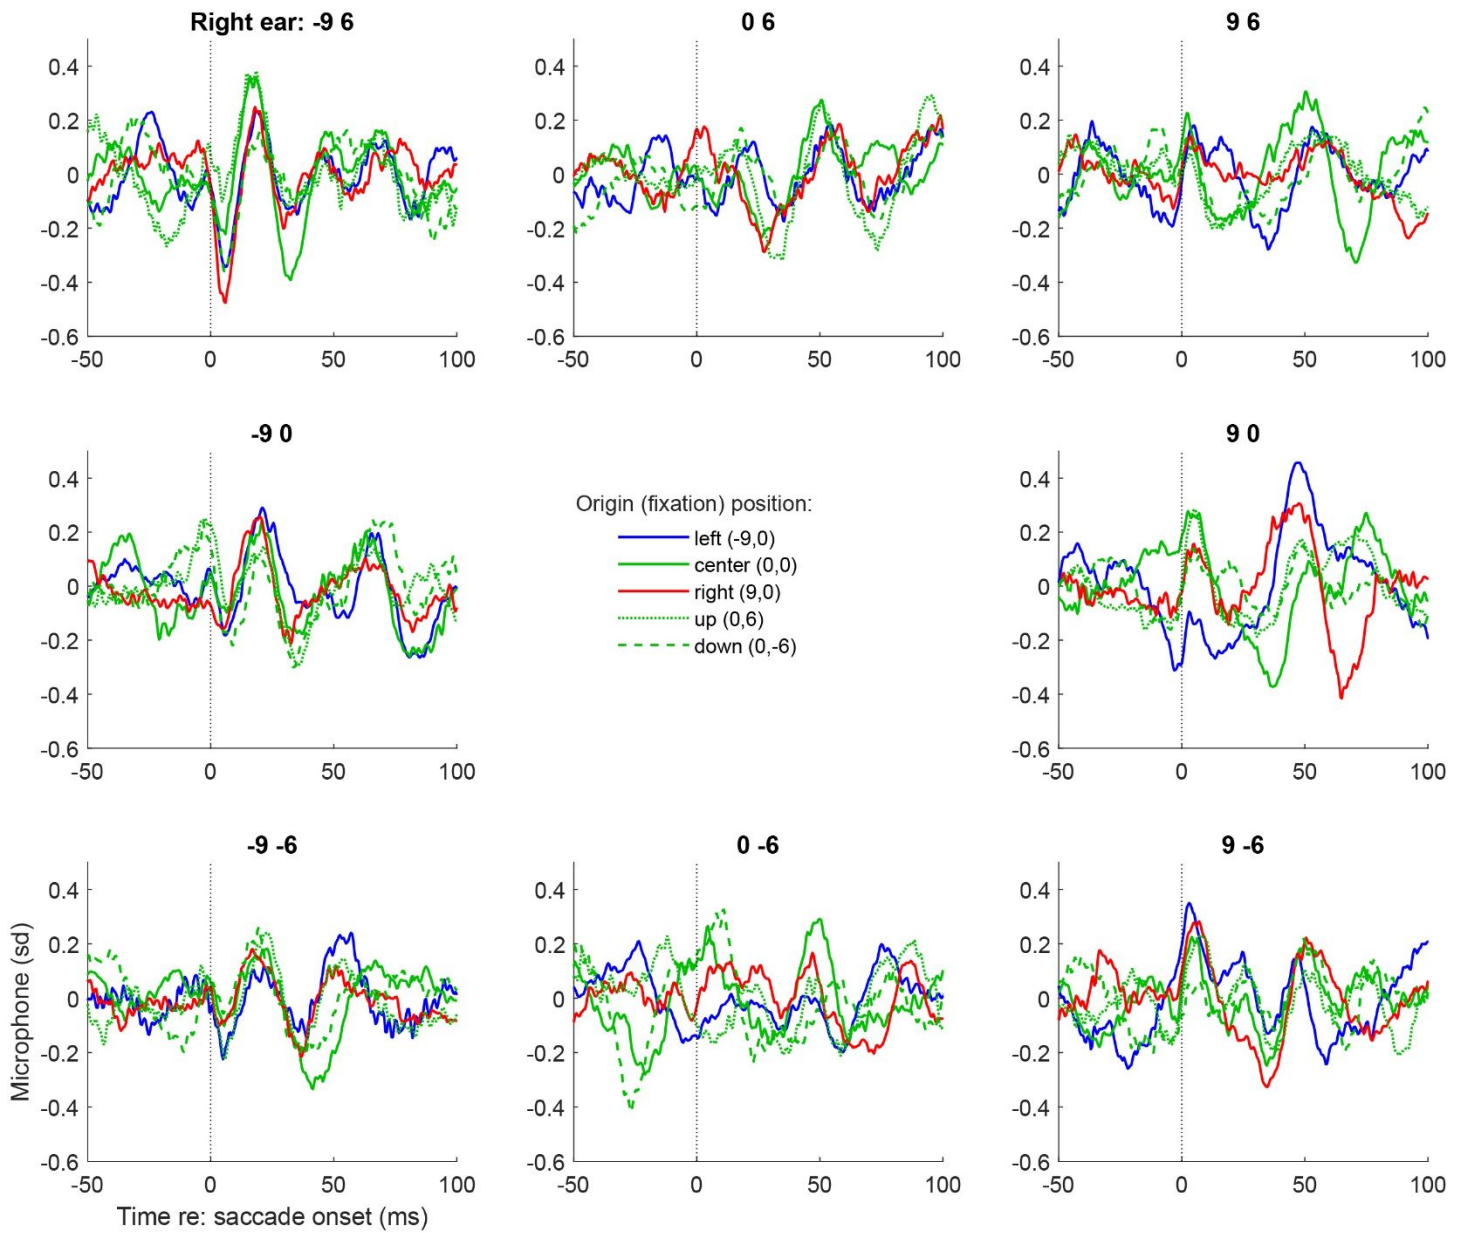

**Supplementary Figure 2.** Grand average EMREOs as a function of target location with respect to the fixation position, for  $N=10$  right ears. Same format as Figure 3. The data shown are the same as (a subset of) those shown in Supplementary Figure 1, but here each panel location corresponds to a particular target location defined with respect to the fixation point. The color/linestyle indicate the associated fixation position, as in Supplementary Figure 1.

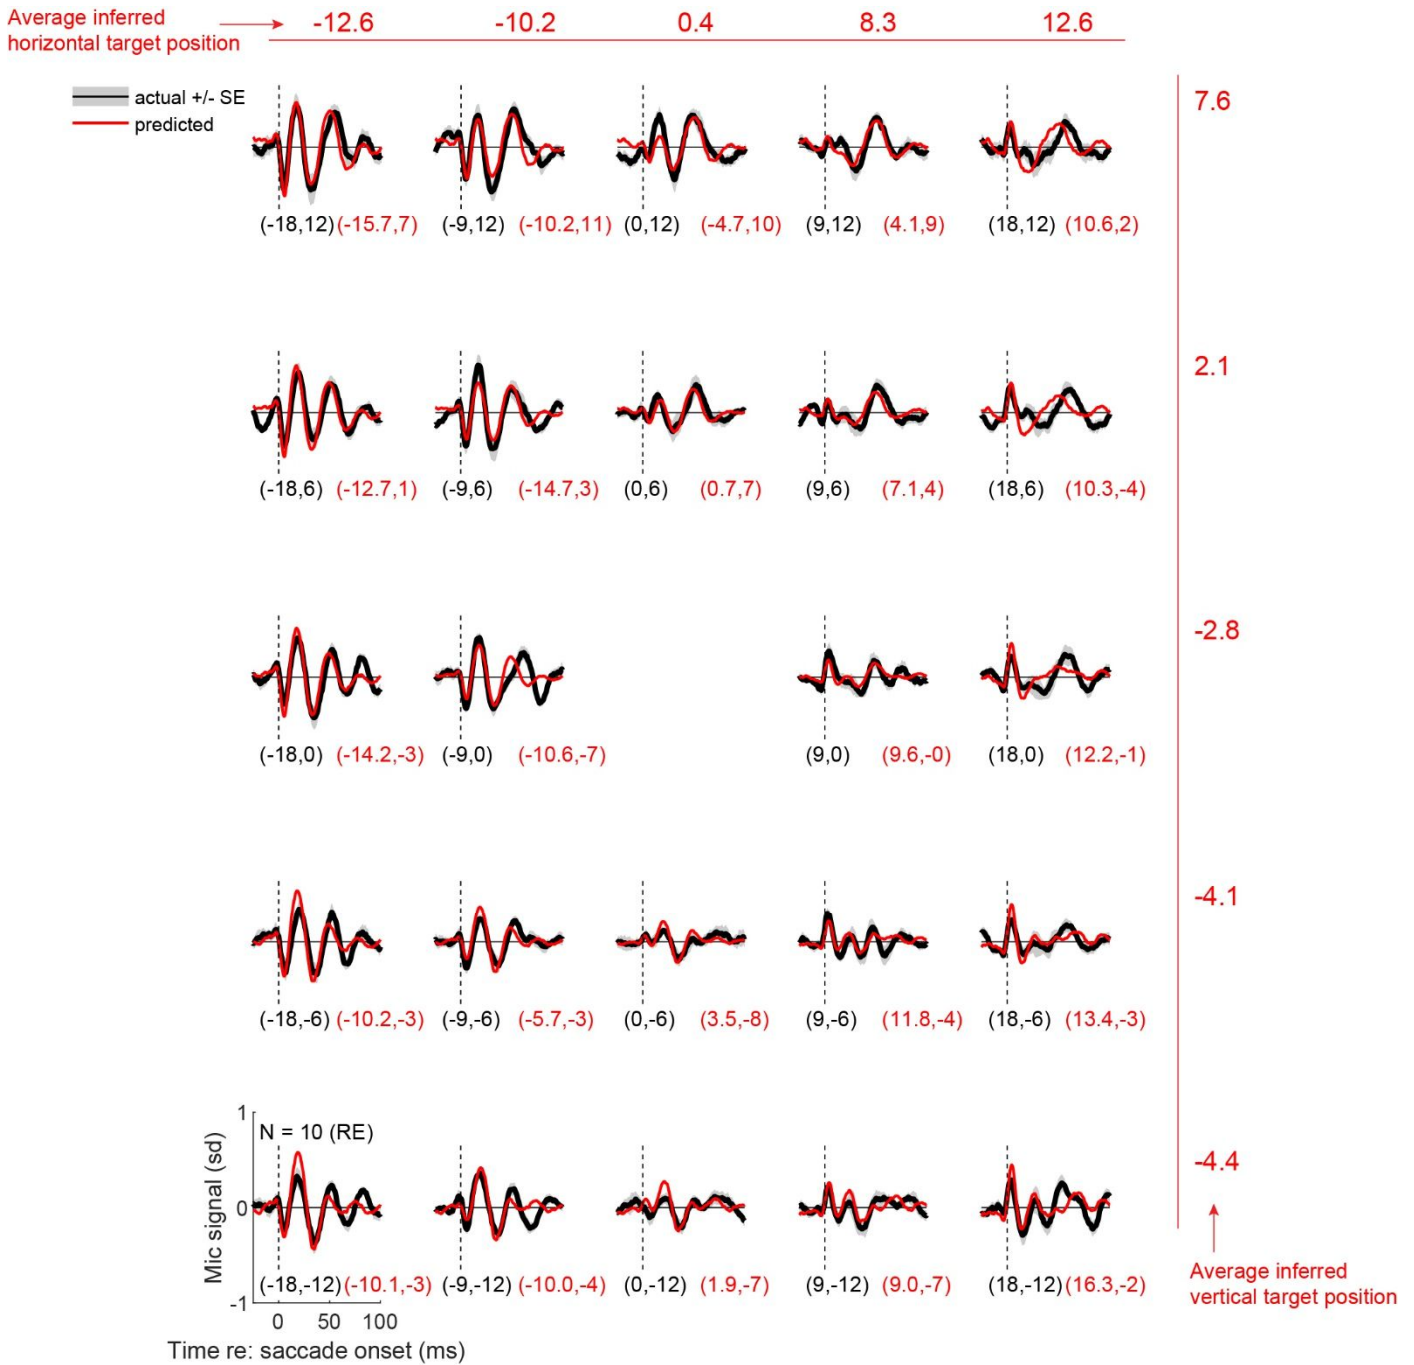

Supplementary Figure 3. Same as Figure 6, but for right ear data. See main text for details.
